# Supplementary material for: Comparative metabolic and lipidomic profiling of human breast cancer cells with different metastatic potentials
Source: PubMed Central journal article supplement (PMC5341861; doi:10.18632/oncotarget.11560), 2016-08-24
Supplement: oncotarget-07-67111-s001.pdf [file oncotarget-07-67111-s001.pdf]

# Comparative metabolic and lipidomic profiling of human breast cancer cells with different metastatic potentials

## SUPPLEMENTARY FIGURES AND TABLES

**A**

NL: 8.46E4

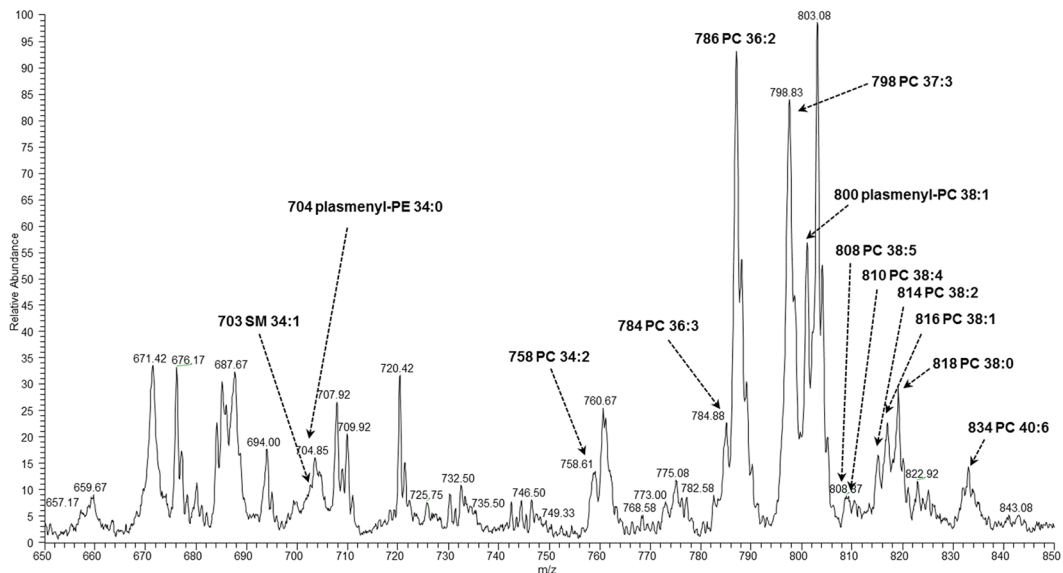

**B**

NL: 1.11E4

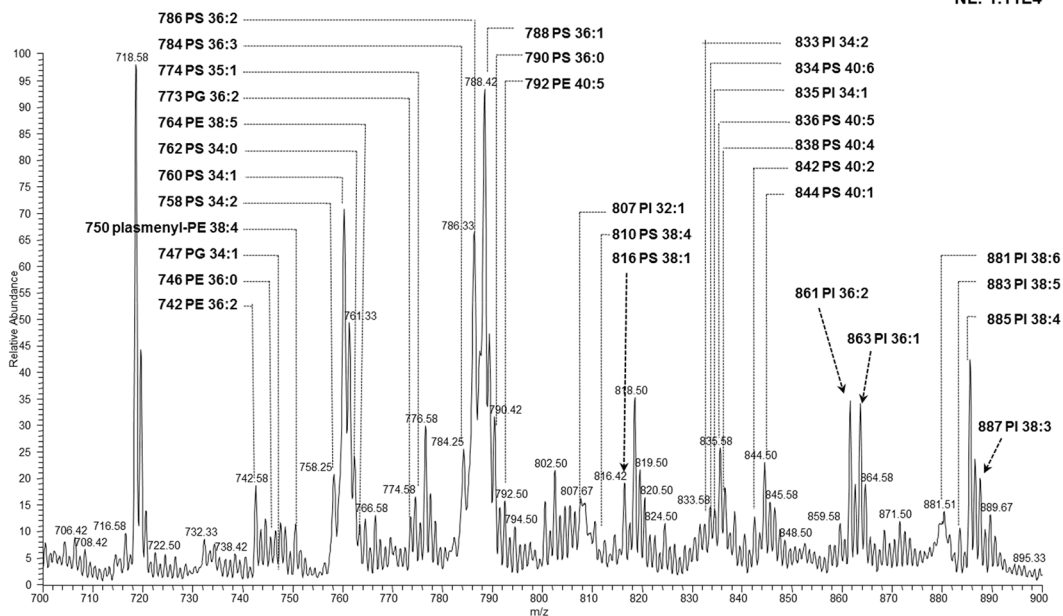

Supplementary Figure S1: Representative spectra of lipid profiles from mammary epithelial and breast cancer cells, derived from nano-electrospray mass spectrometry in A. positive ion mode and B. negative ion mode.

Compound #1

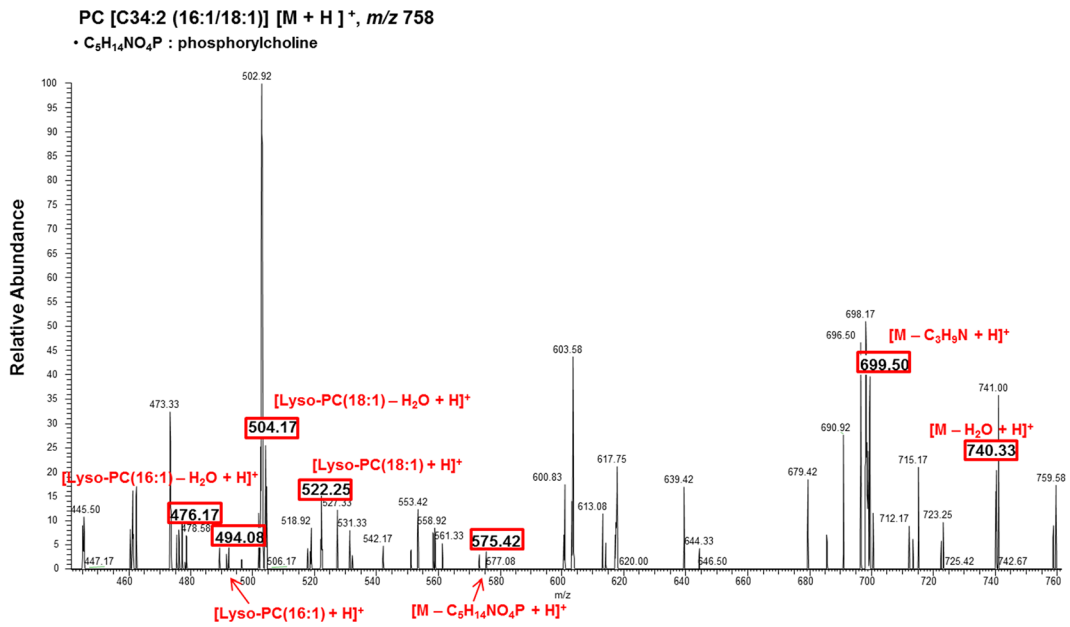

Compound #2

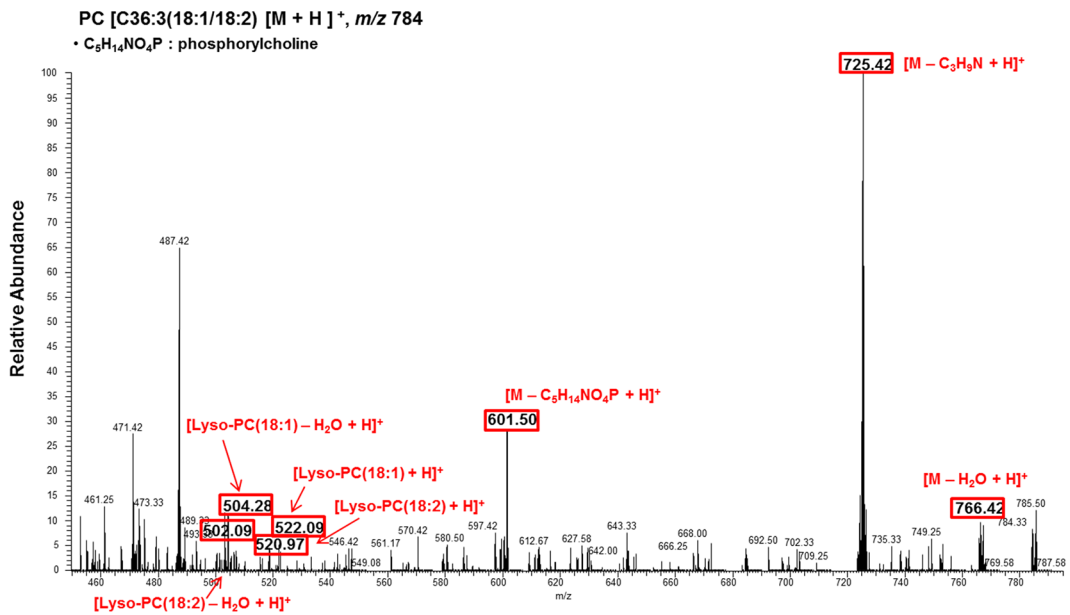

(Continued)

Compound #3

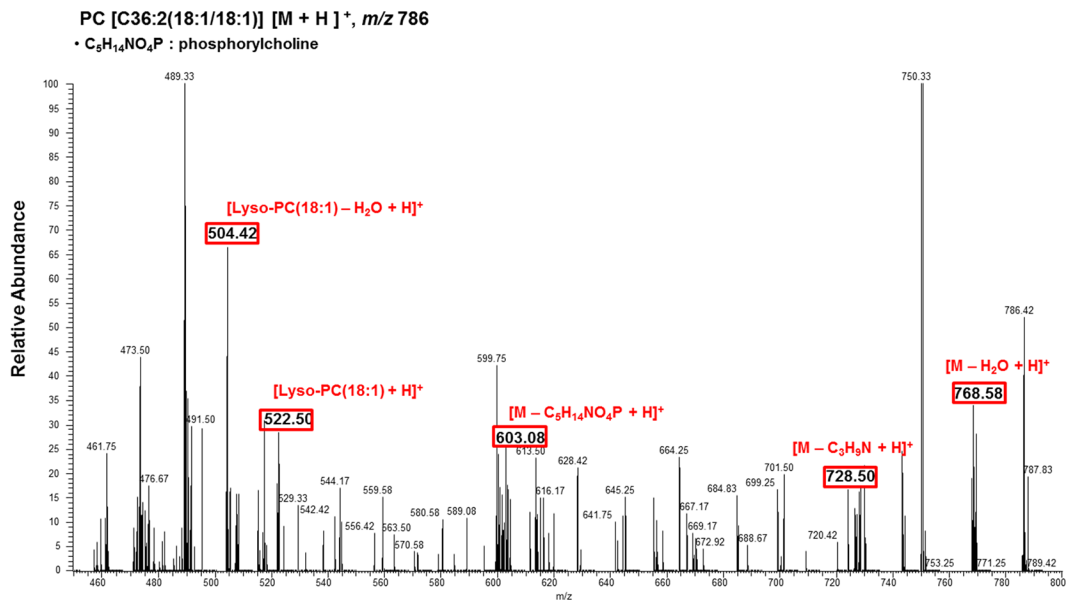

Compound #4

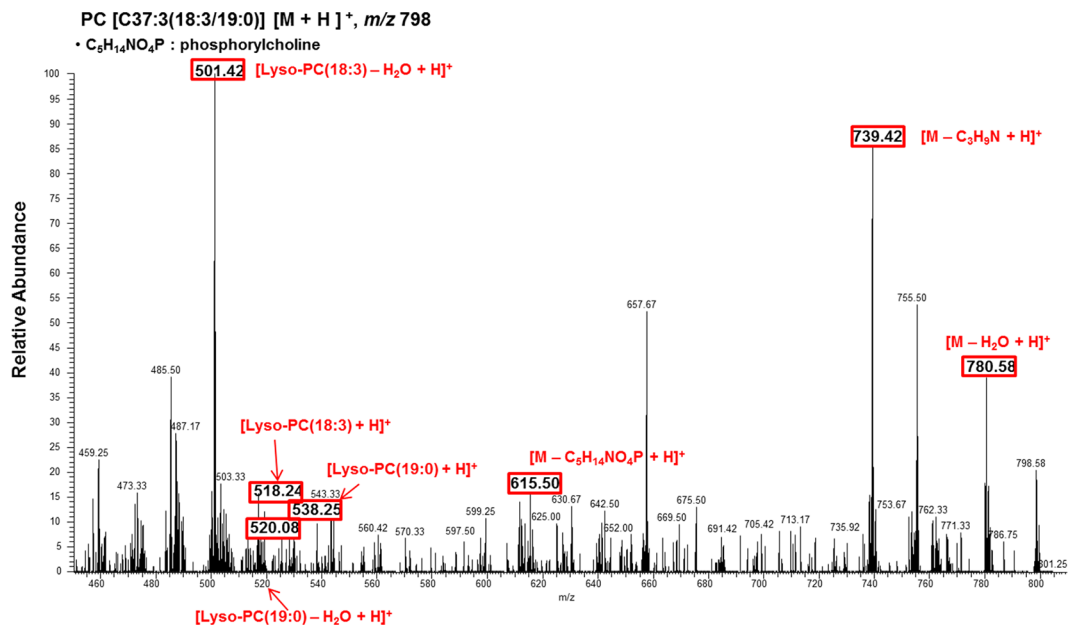

(Continued)

Compound #5

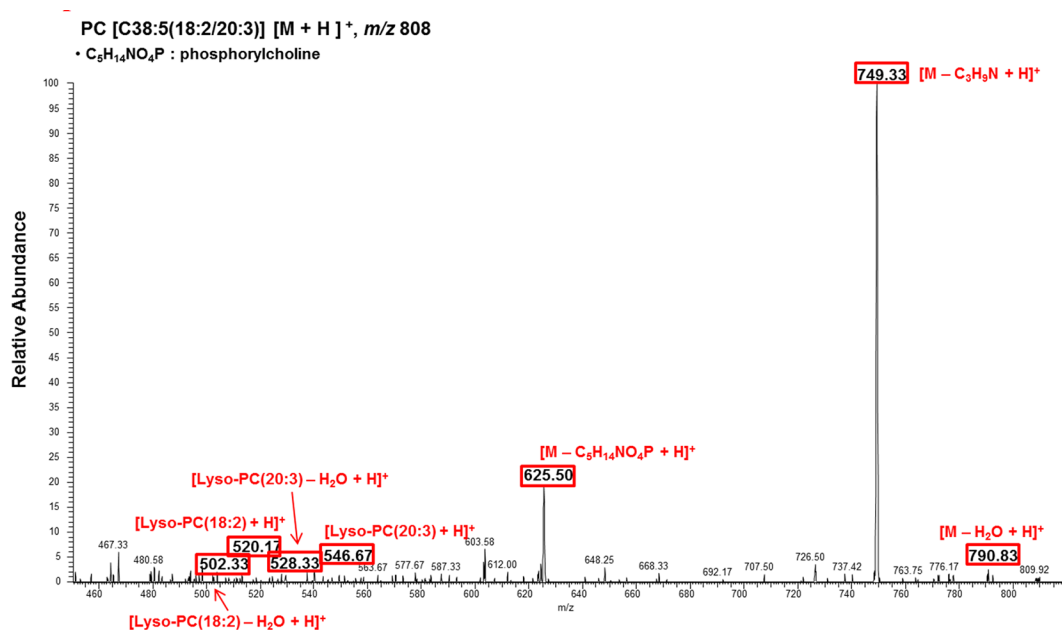

Compound #6

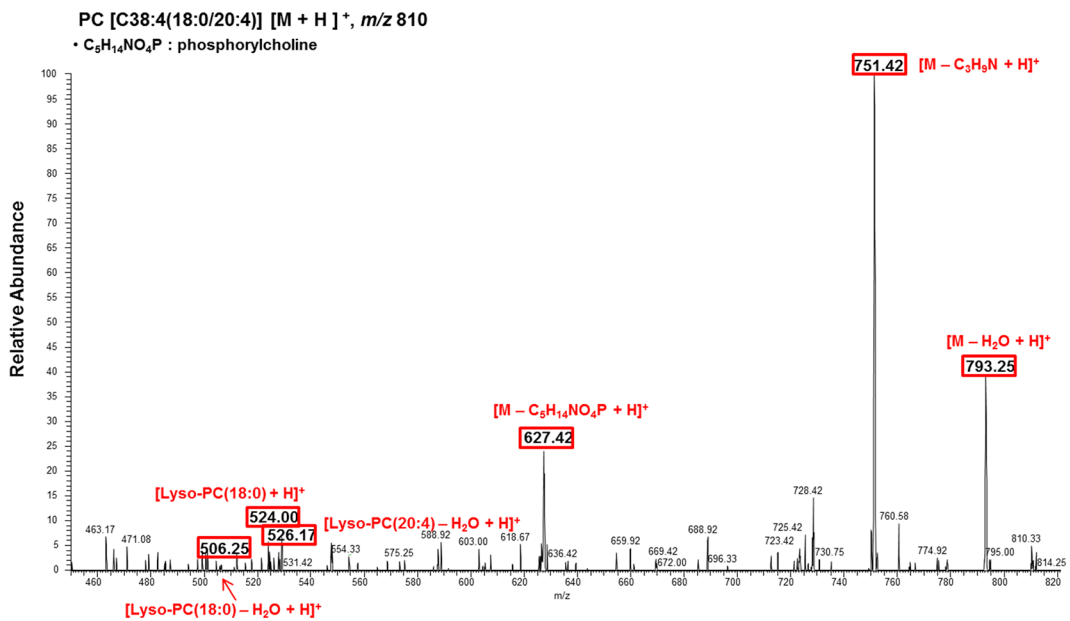

(Continued)



Compound #7

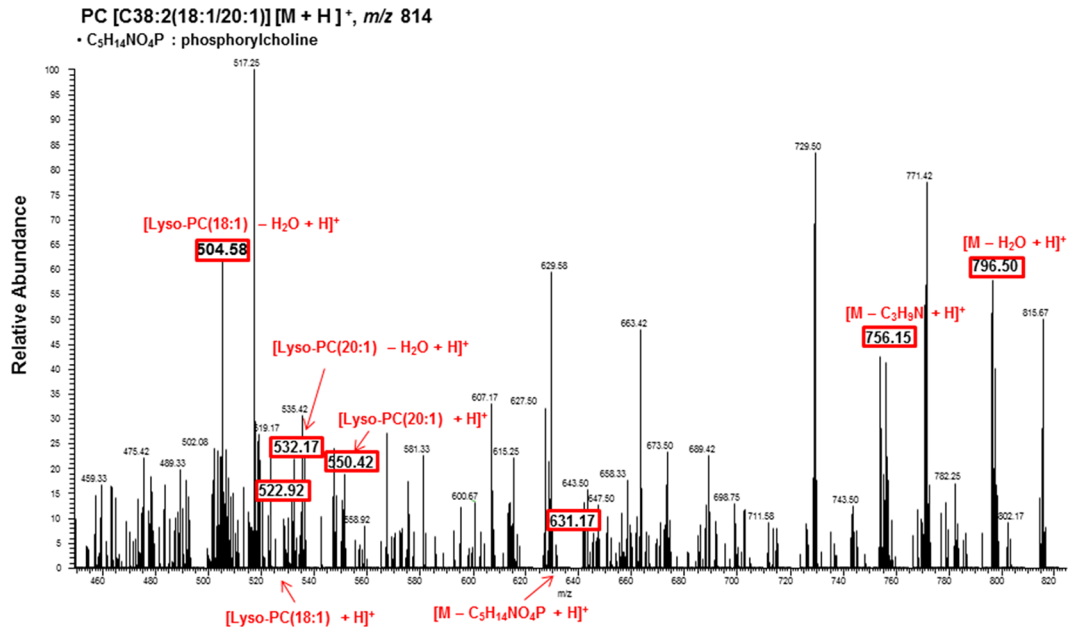

Compound #8

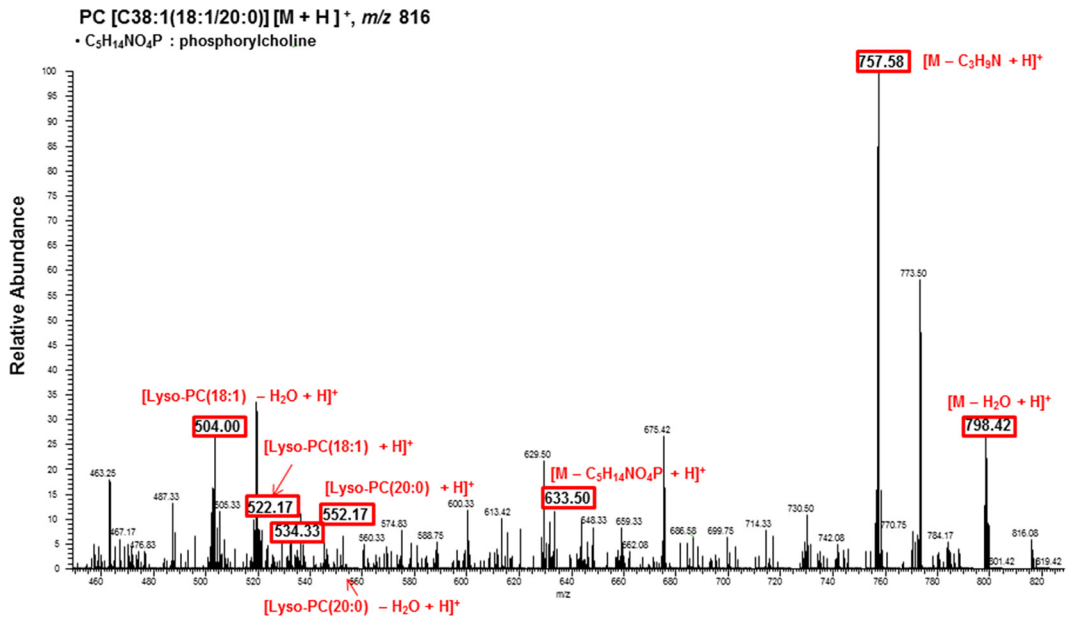

(Continued)

Compound #9

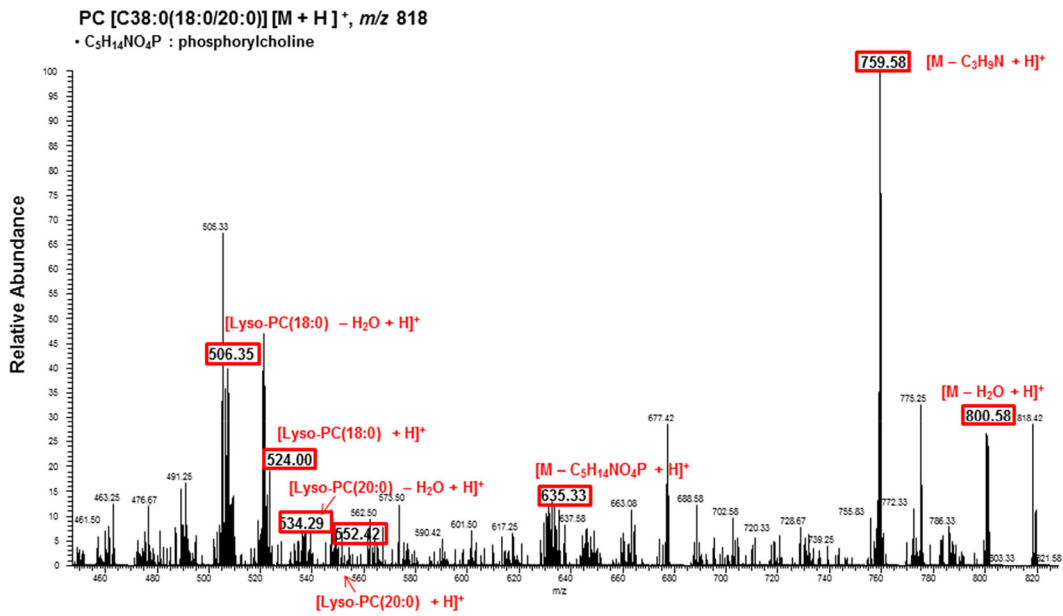

Compound #10

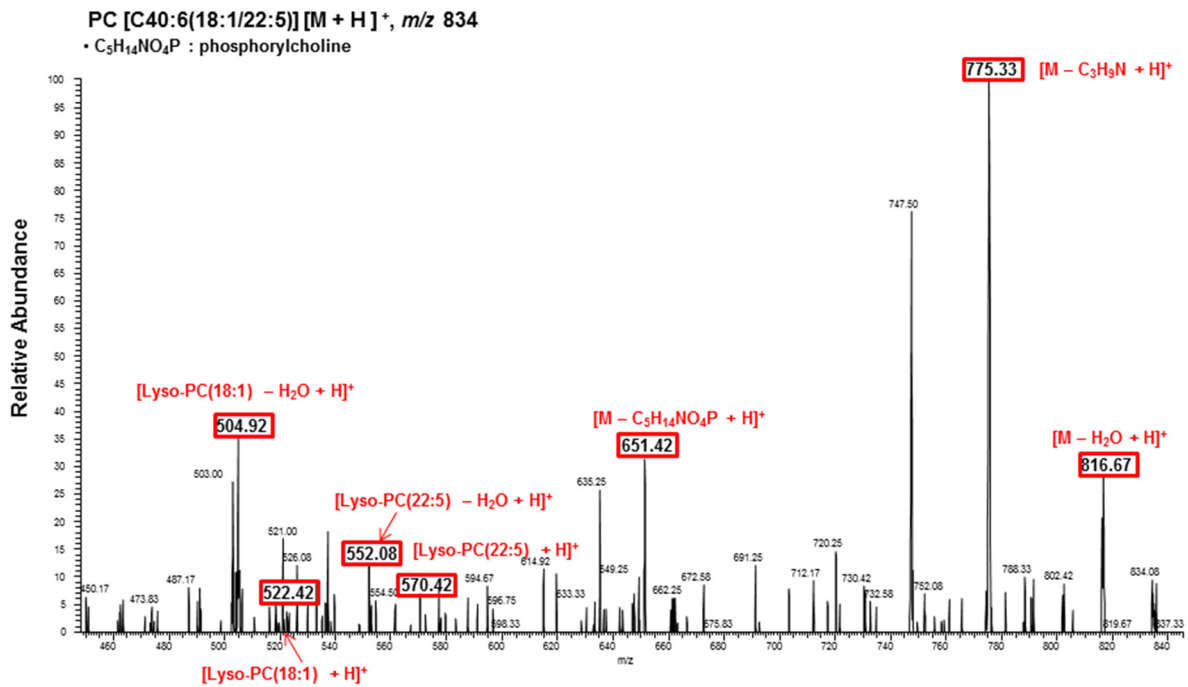

(Continued)

Compound #11

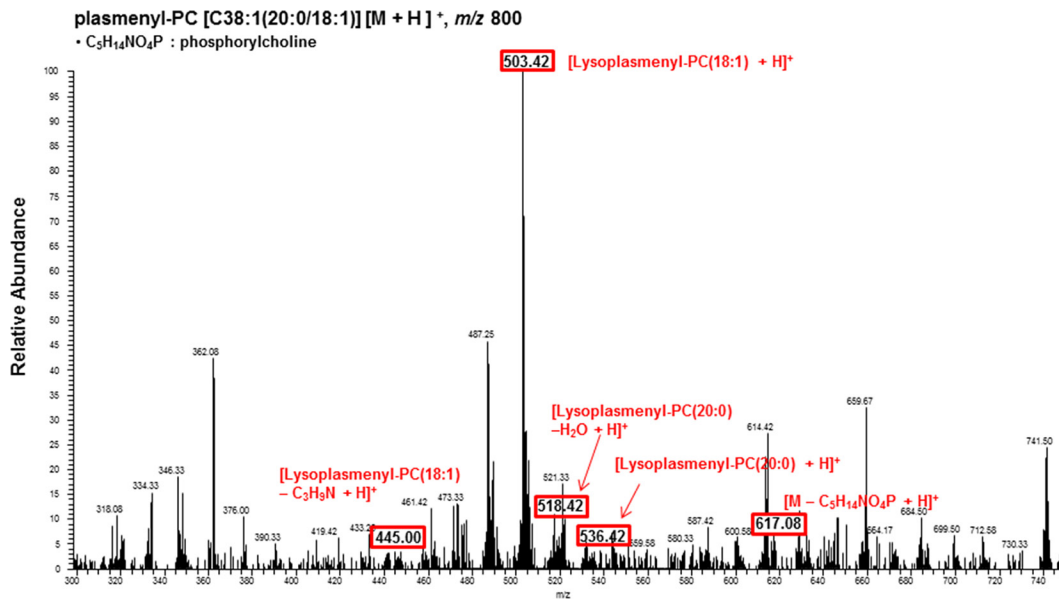

Compound #12

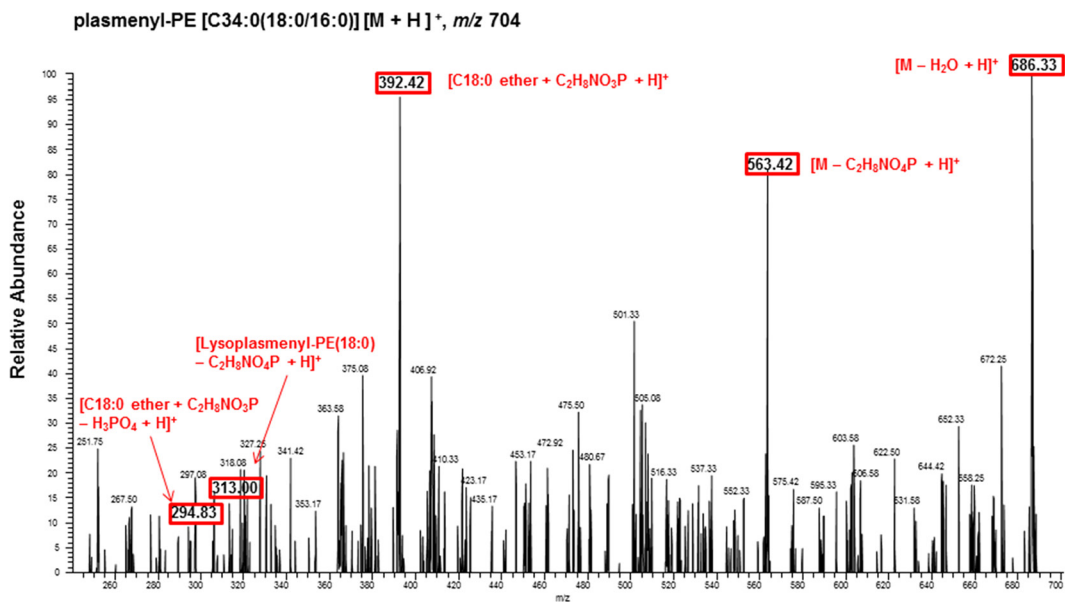

(Continued)

Compound #13

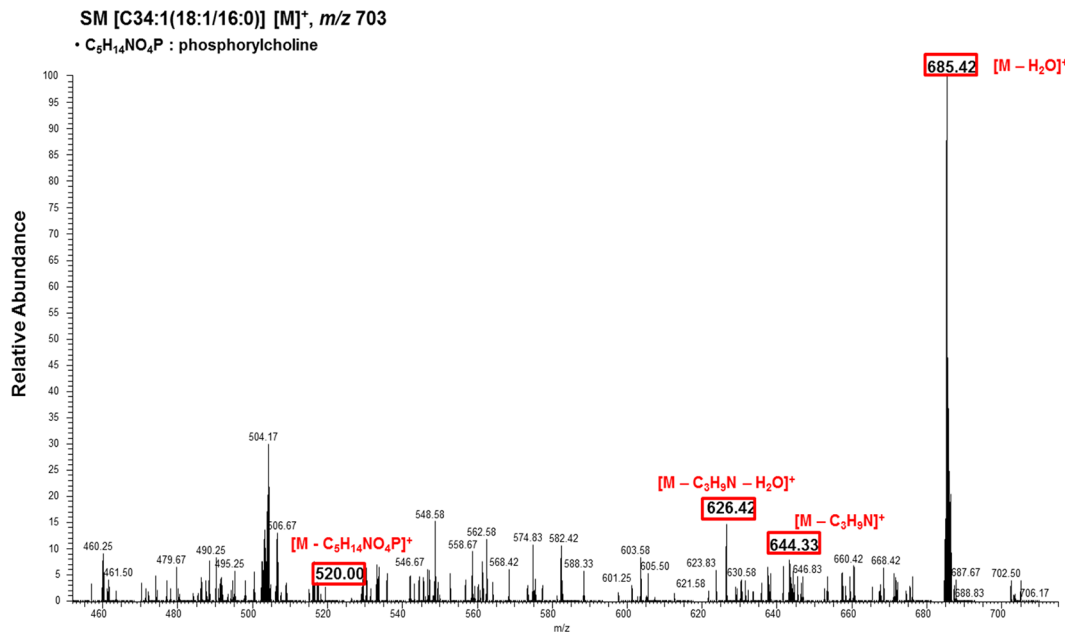

Compound #14

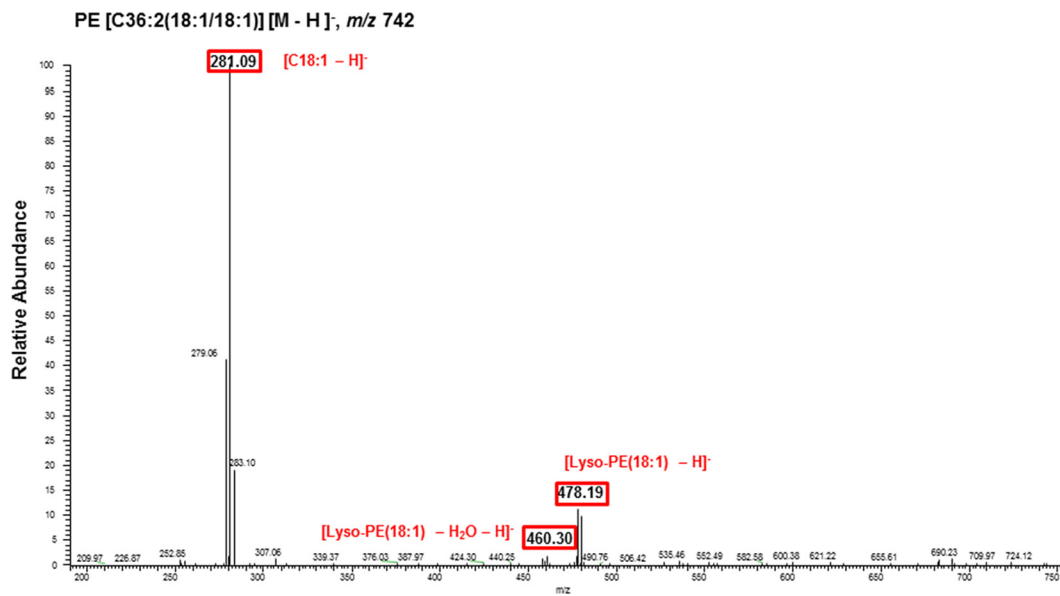

(Continued)

Compound #15

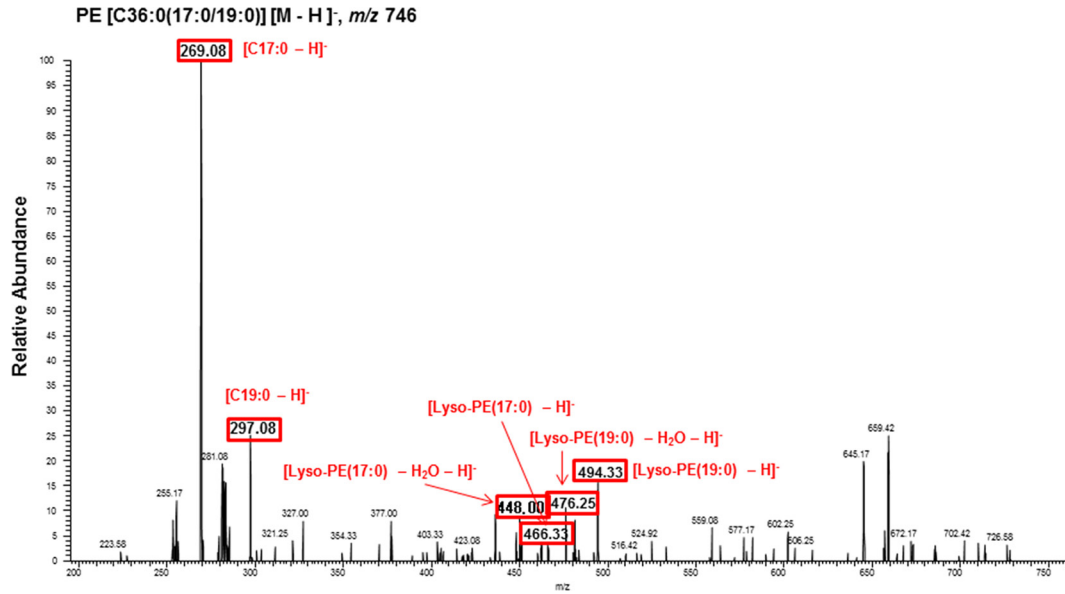

Compound #16

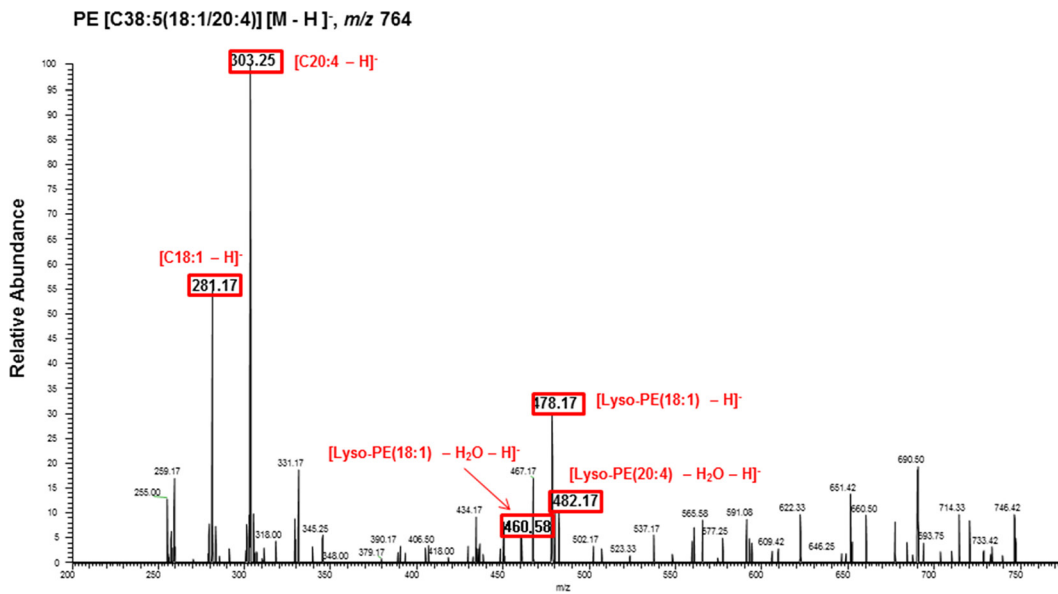

(Continued)

Compound #17

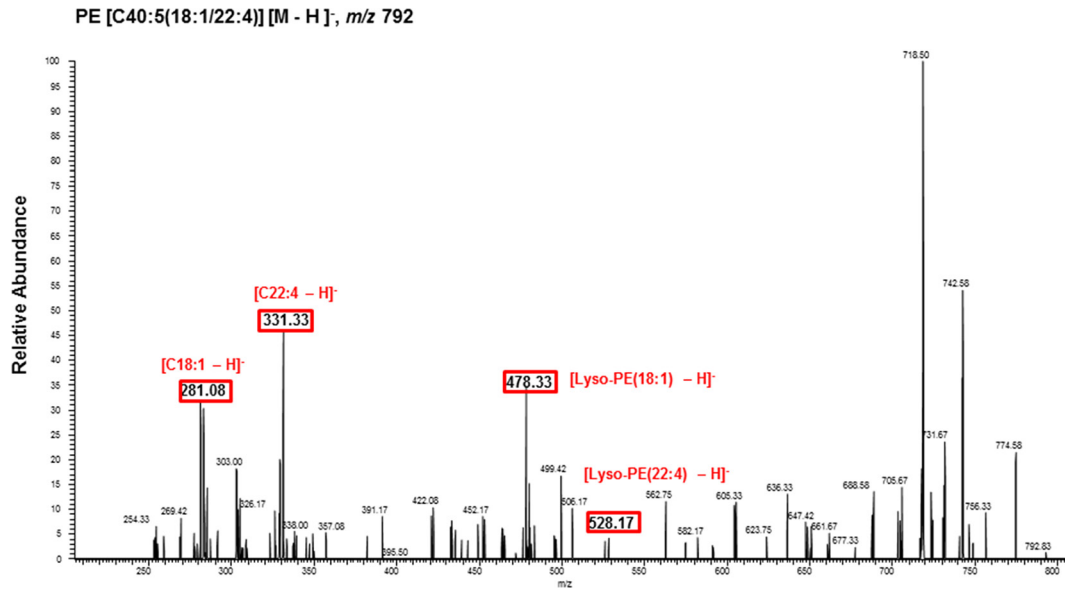

Compound #18

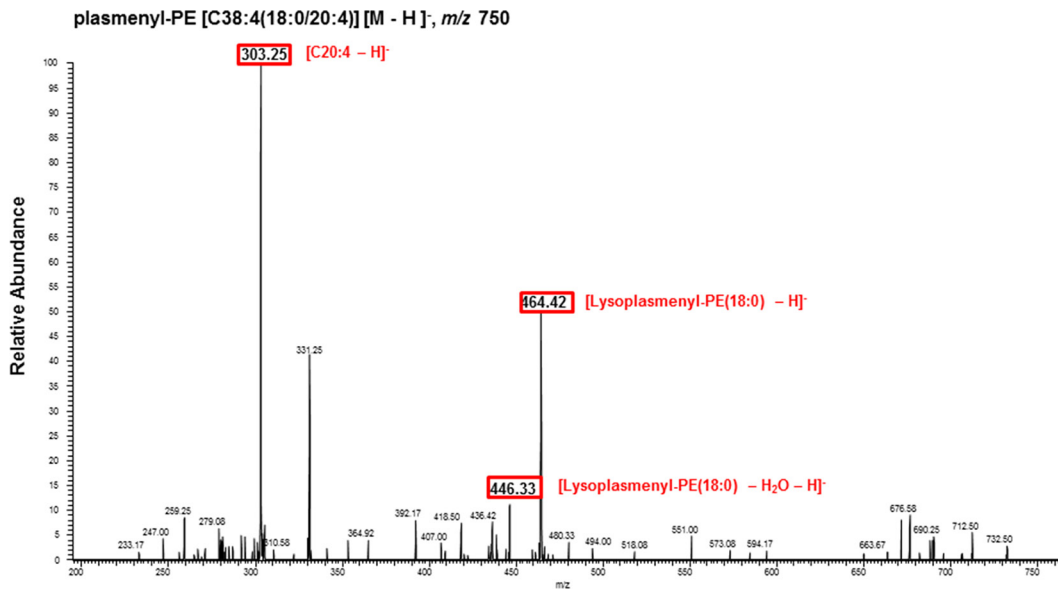

(Continued)

Compound #19

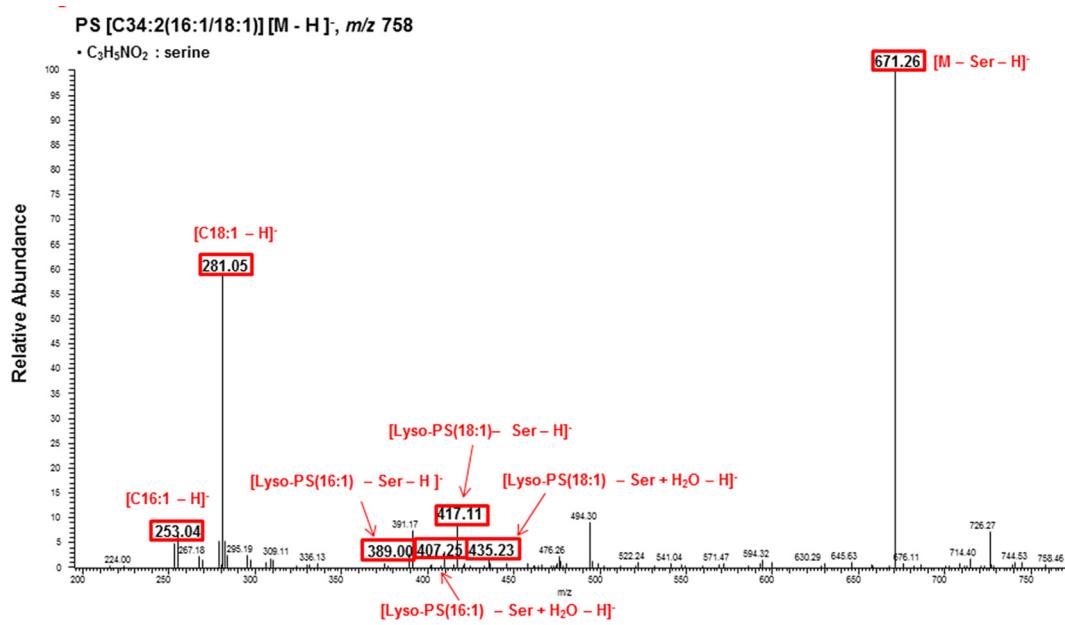

Compound #20

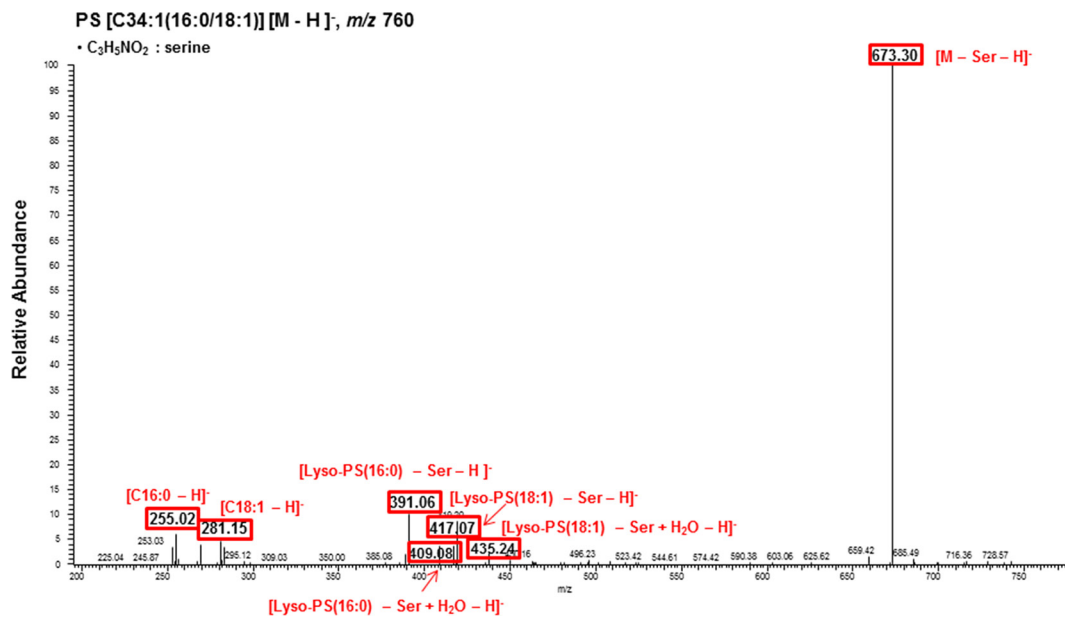

(Continued)

Compound #21

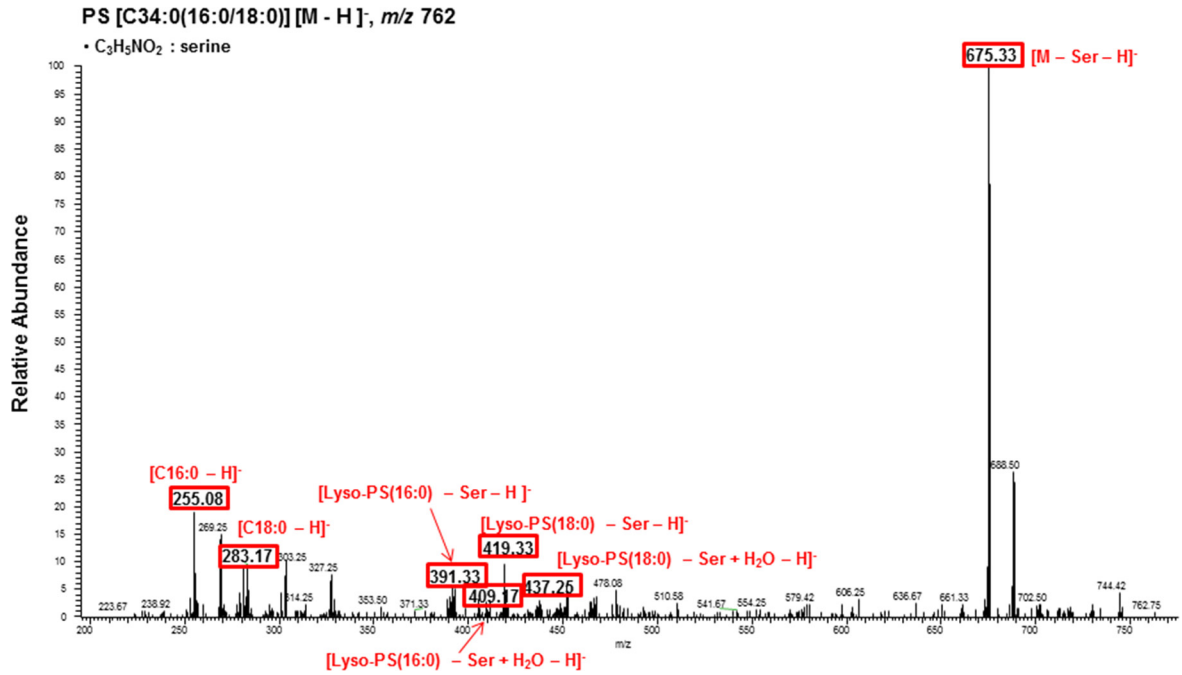

Compound #22

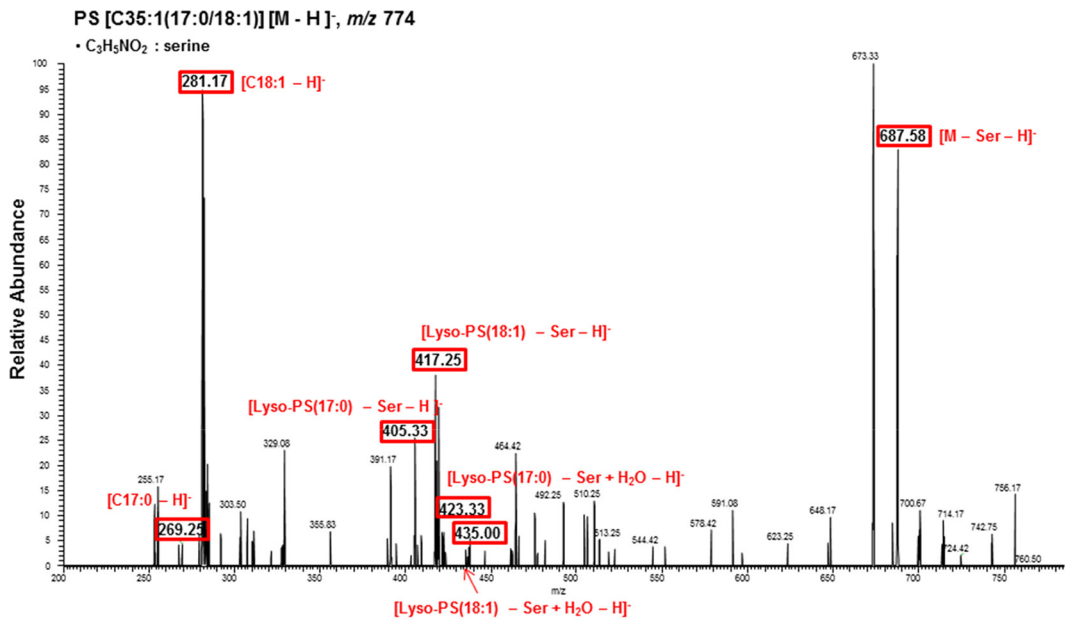

(Continued)



Compound #23

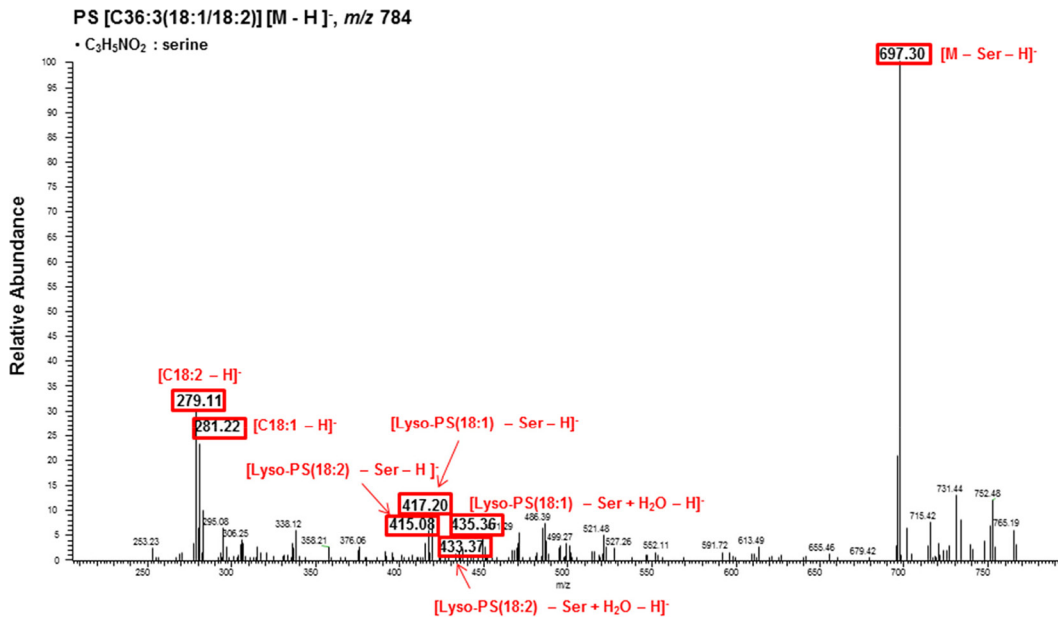

Compound #24

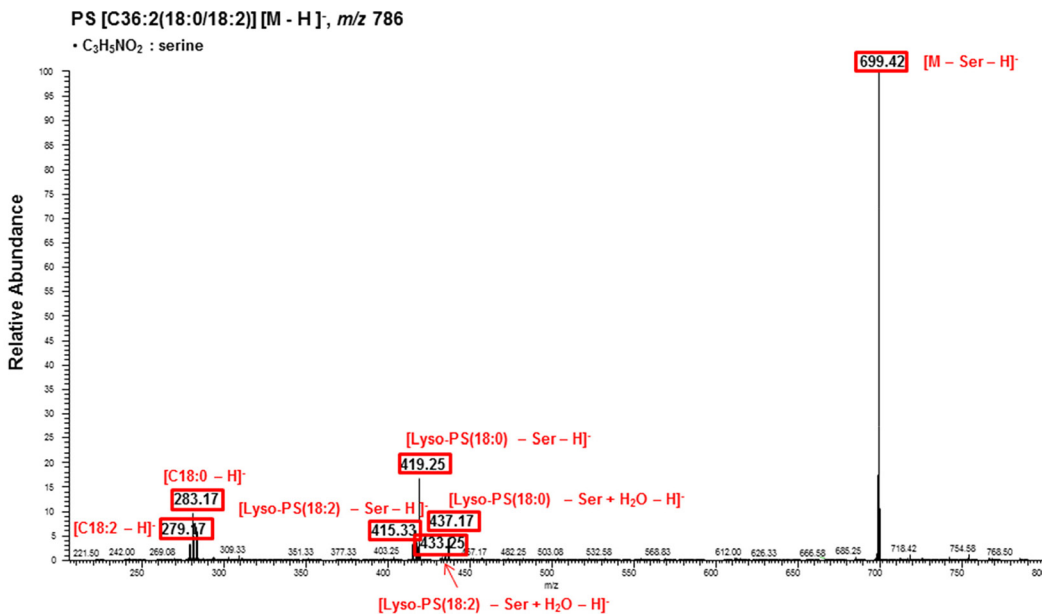

(Continued)

Compound #25

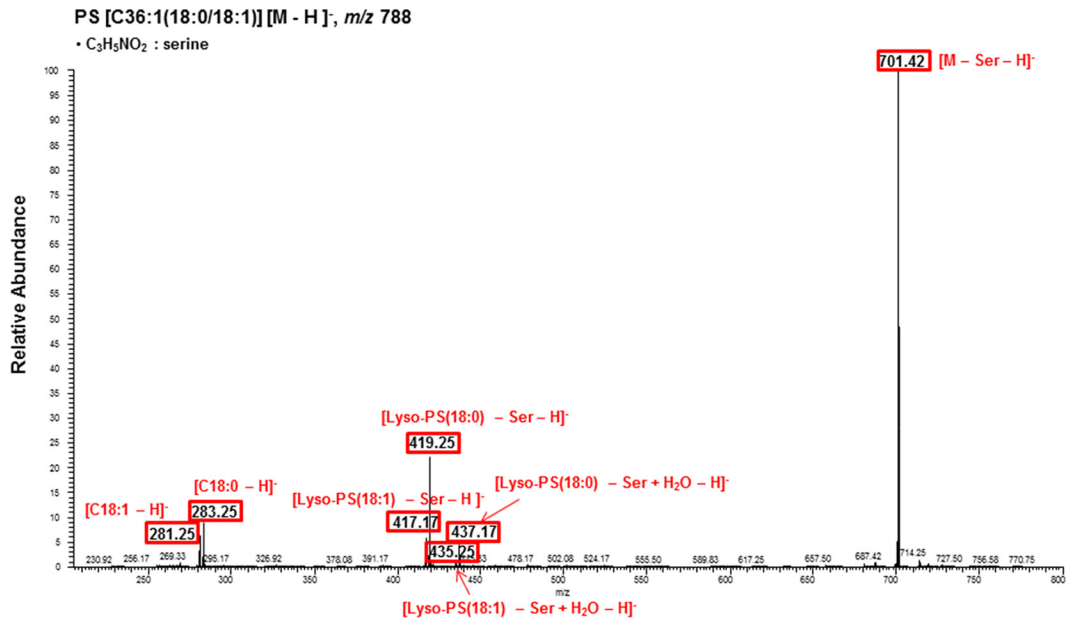

Compound #26

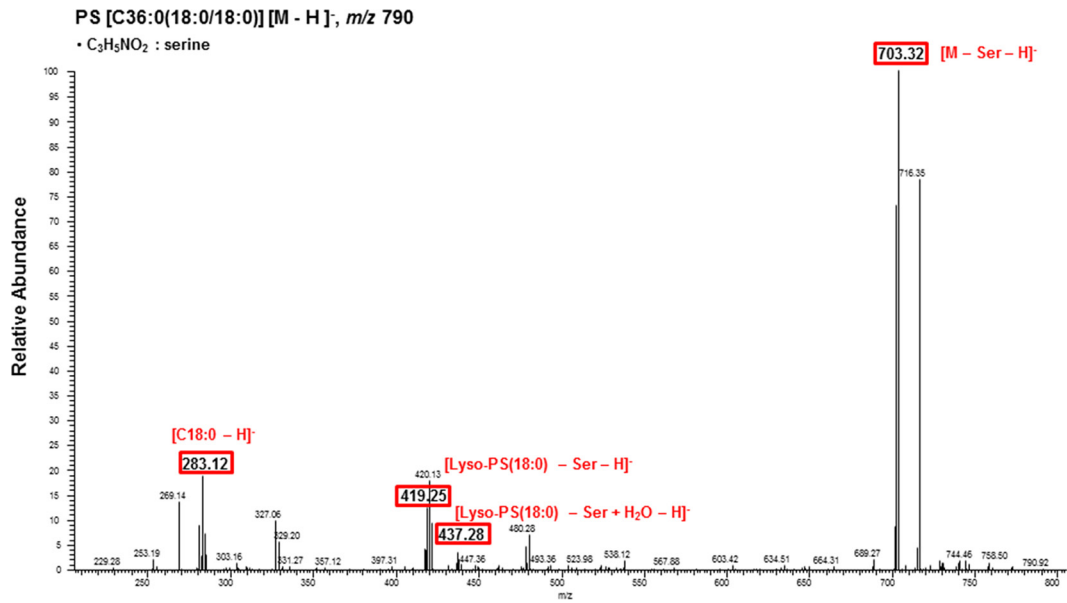

(Continued)

Compound #27

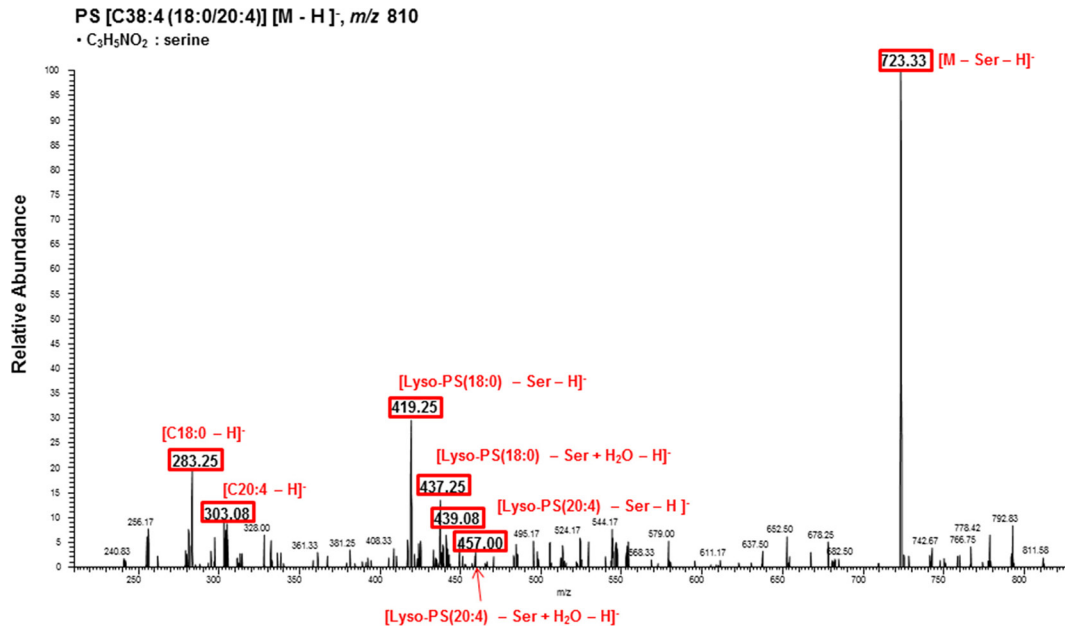

Compound #28

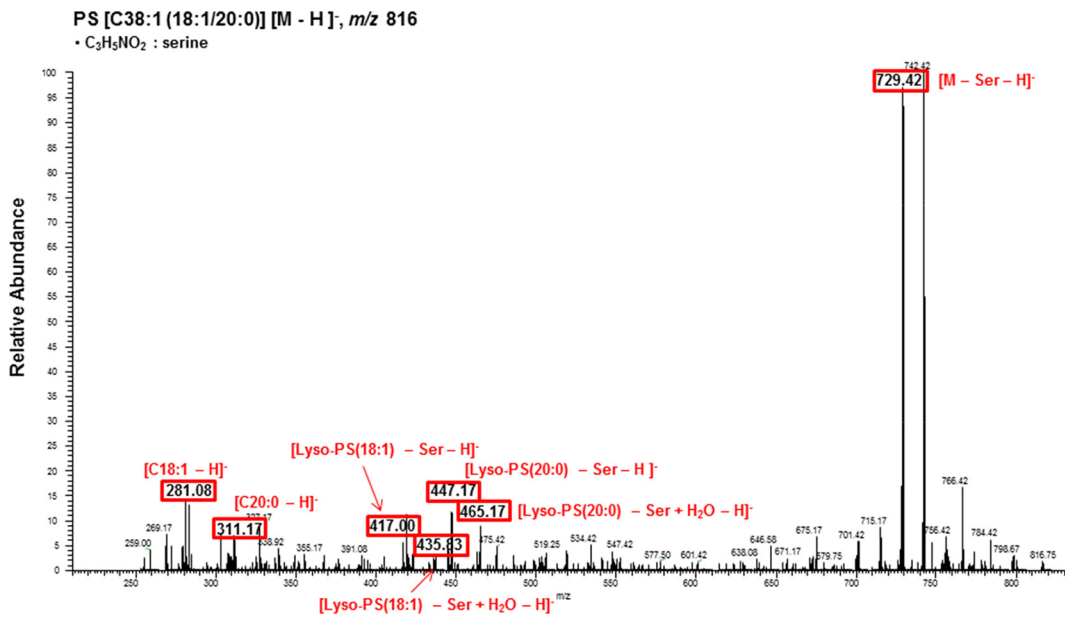

(Continued)

Compound #29

PS [C40:6 (18:0/22:6)] [M - H]<sup>-</sup>, m/z 834  
 • C<sub>3</sub>H<sub>5</sub>NO<sub>2</sub> : serine

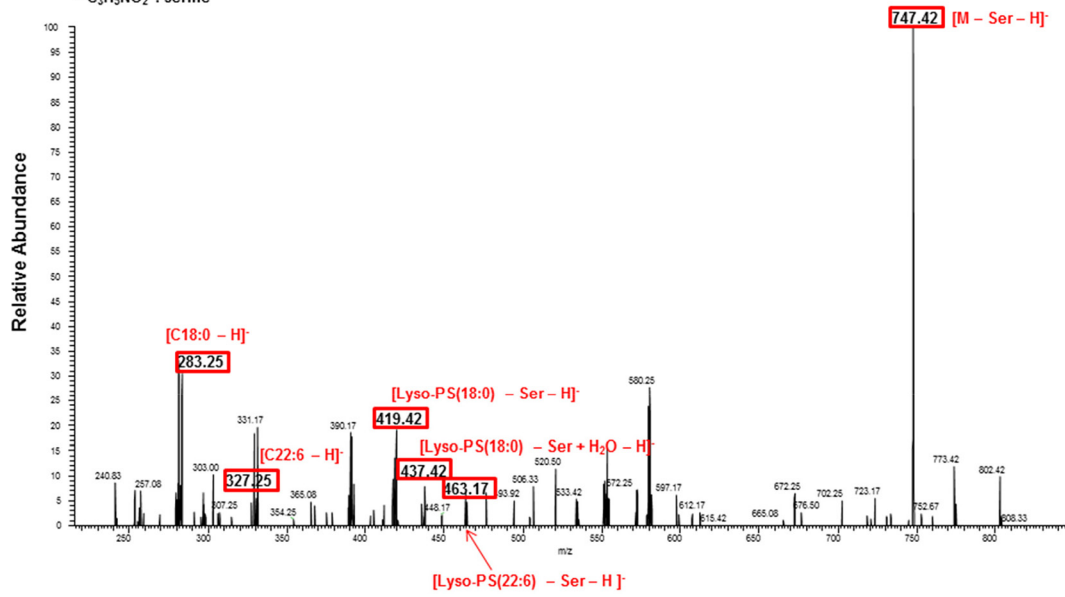

Compound #30

PS [C40:5 (18:1/22:4)] [M - H]<sup>-</sup>, m/z 836  
 • C<sub>3</sub>H<sub>5</sub>NO<sub>2</sub> : serine

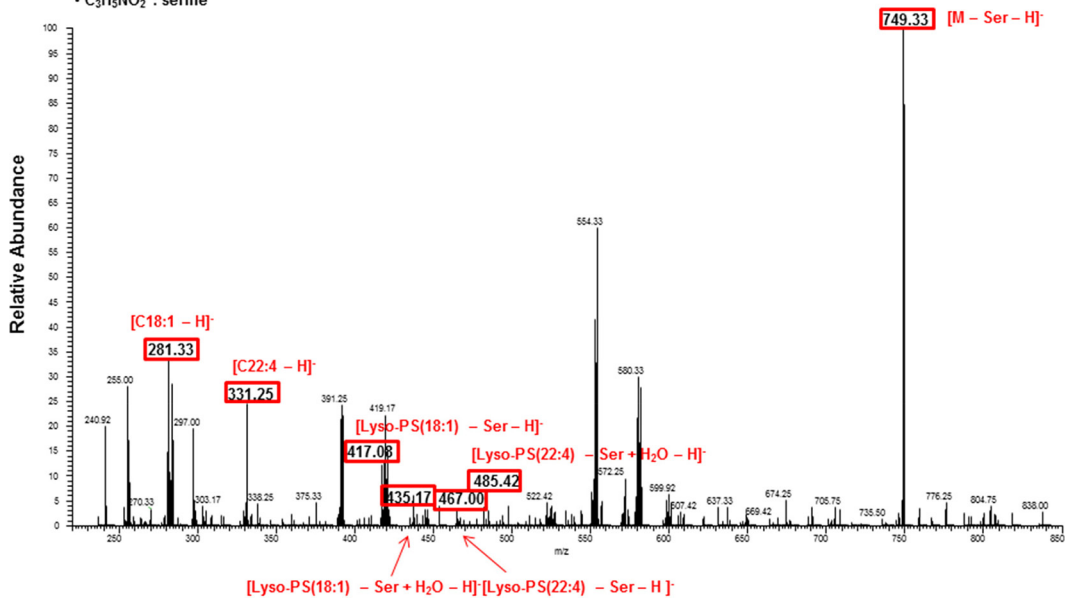

(Continued)

Compound #31

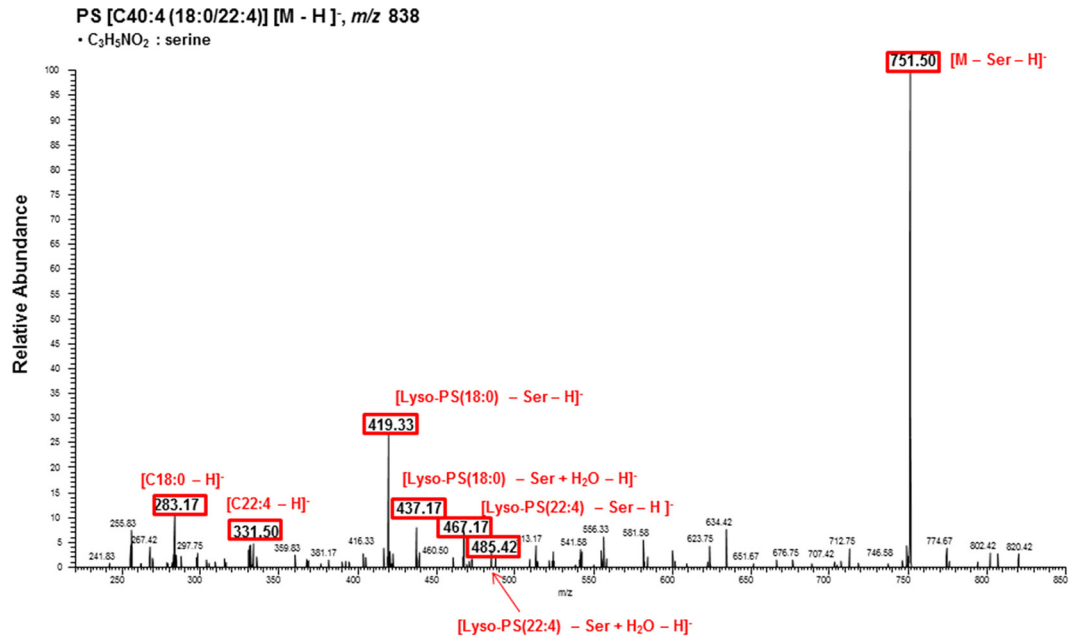

Compound #32

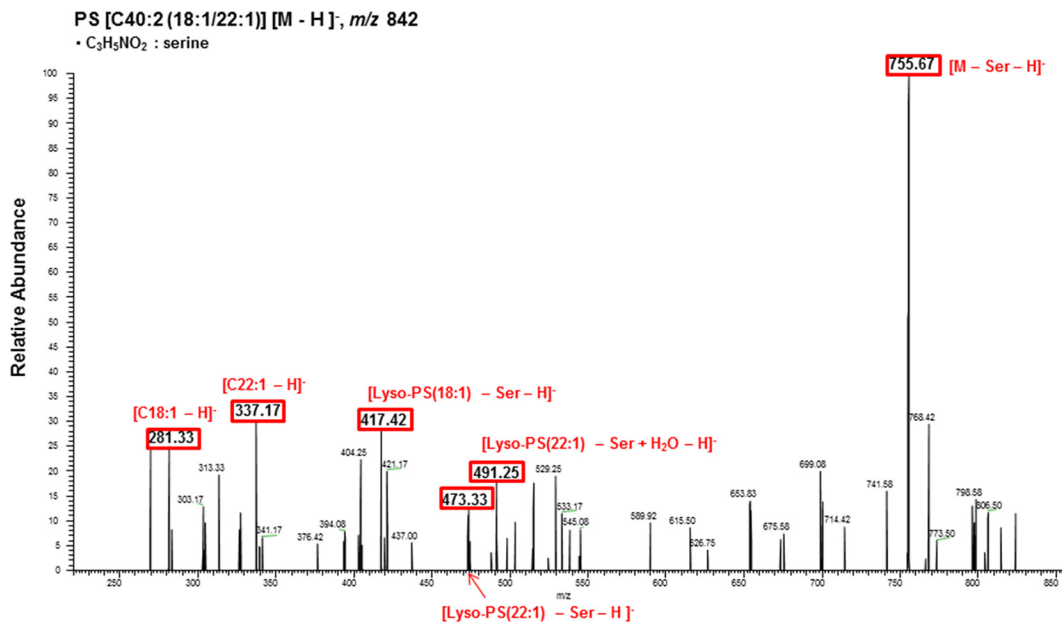

(Continued)

Compound #33

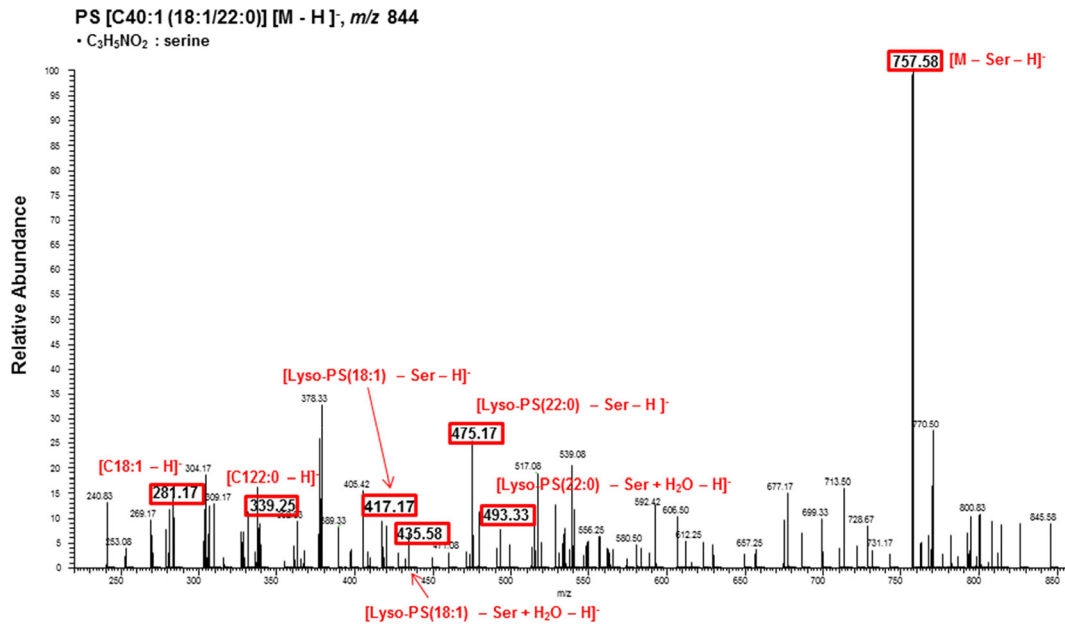

Compound #34

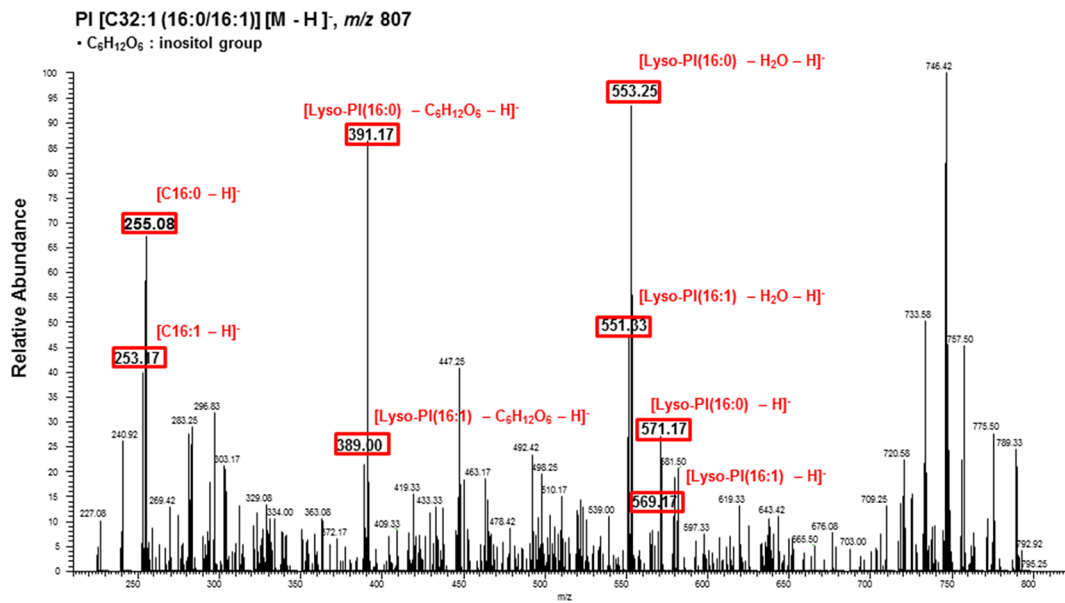

(Continued)

Compound #35

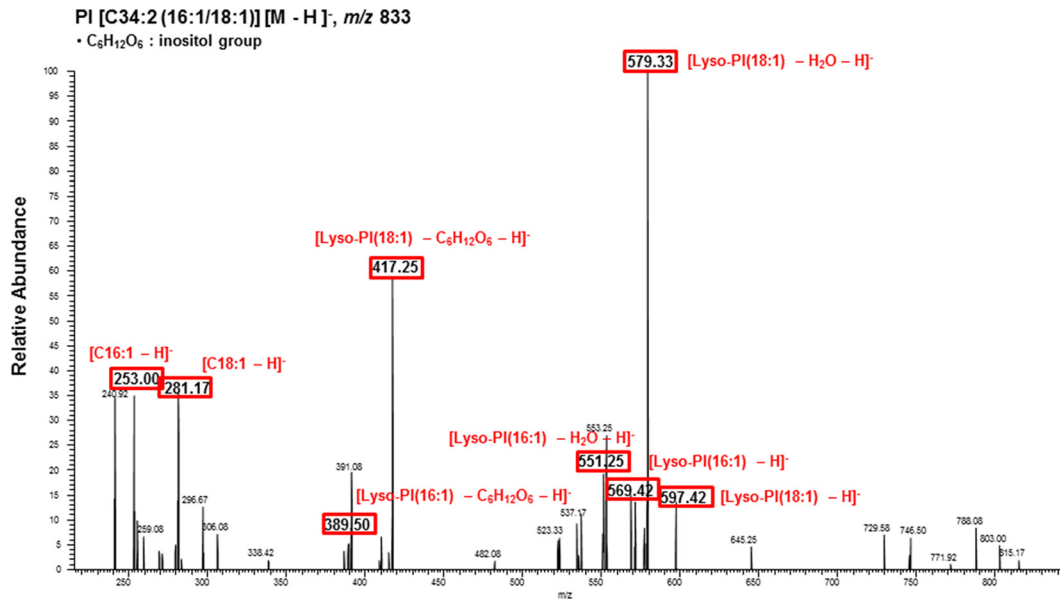

Compound #36

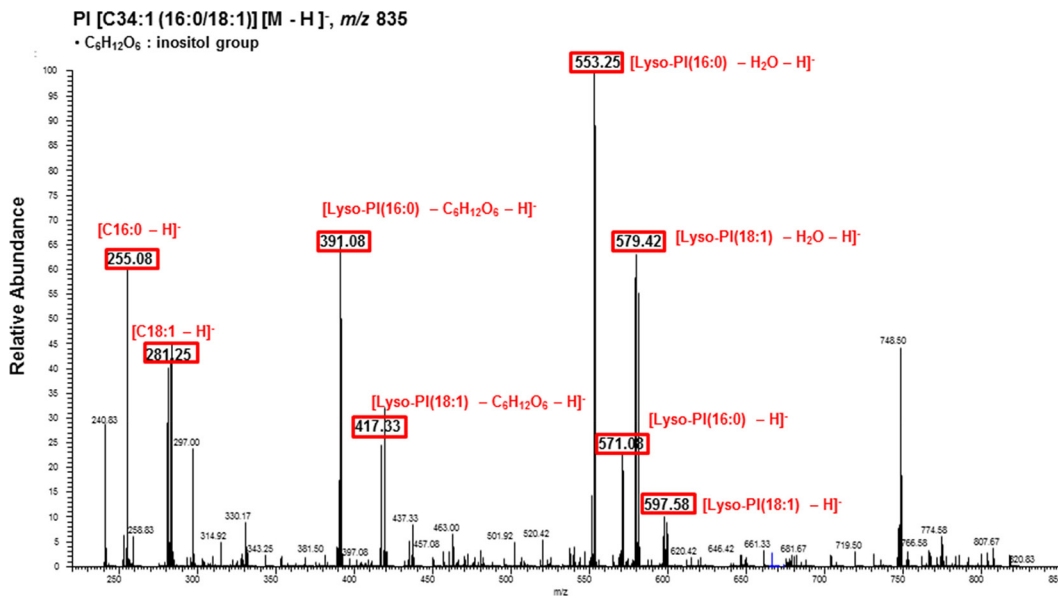

(Continued)

Compound #37

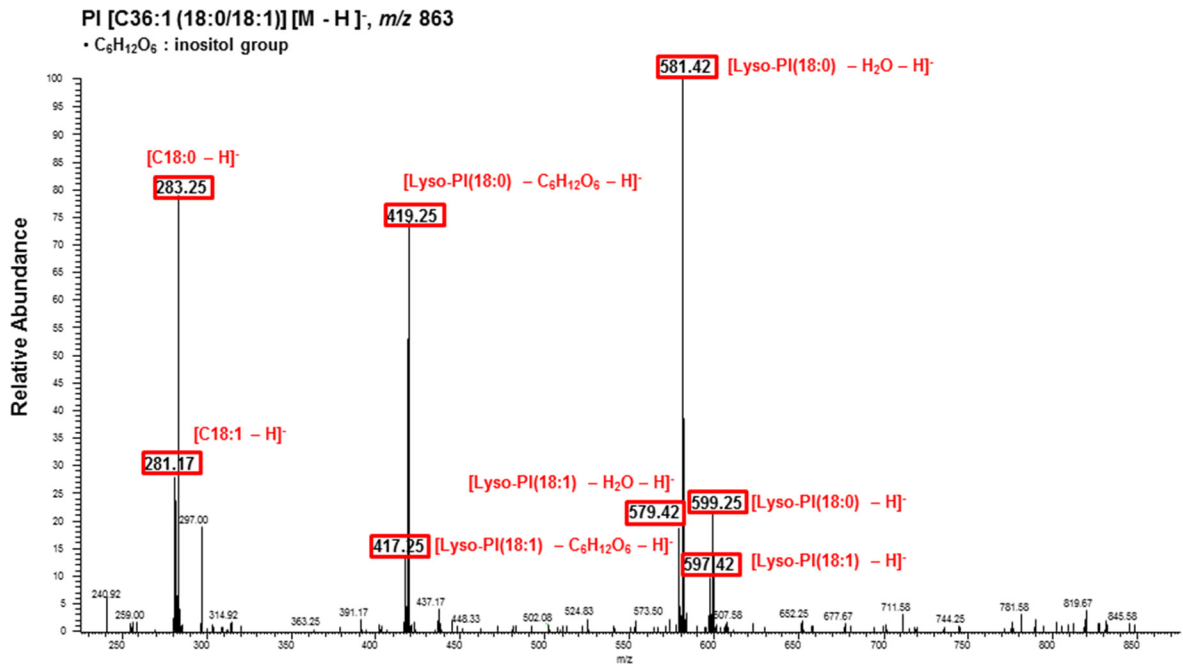

Compound #38

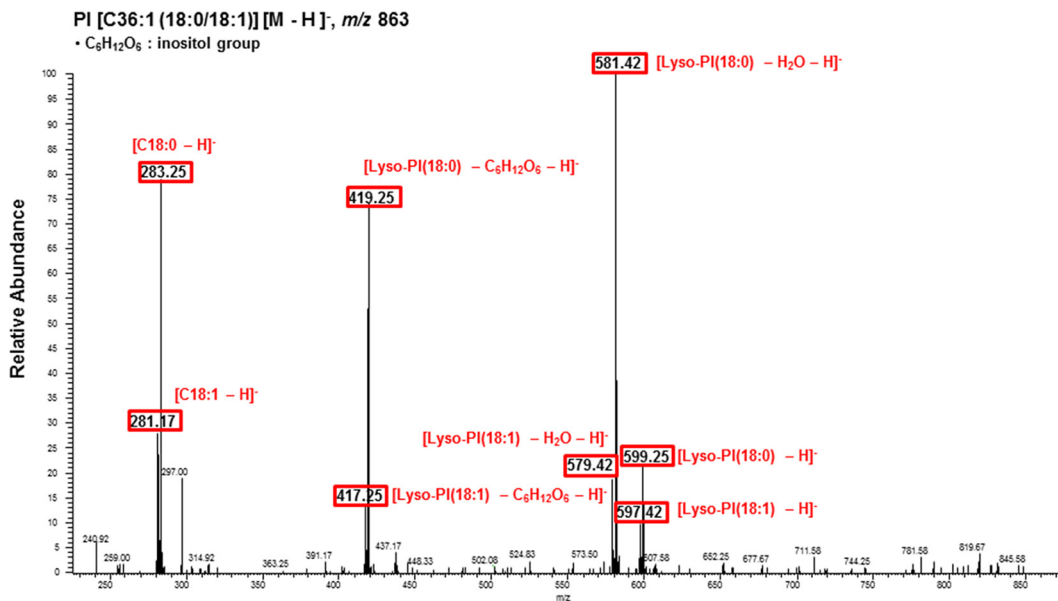

(Continued)



Compound #39

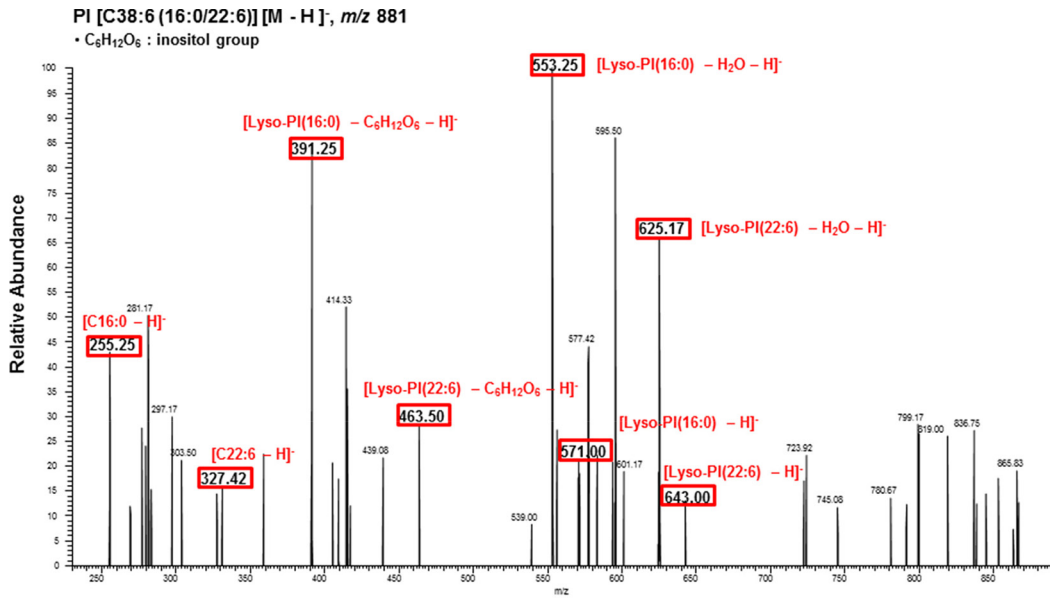

Compound #40

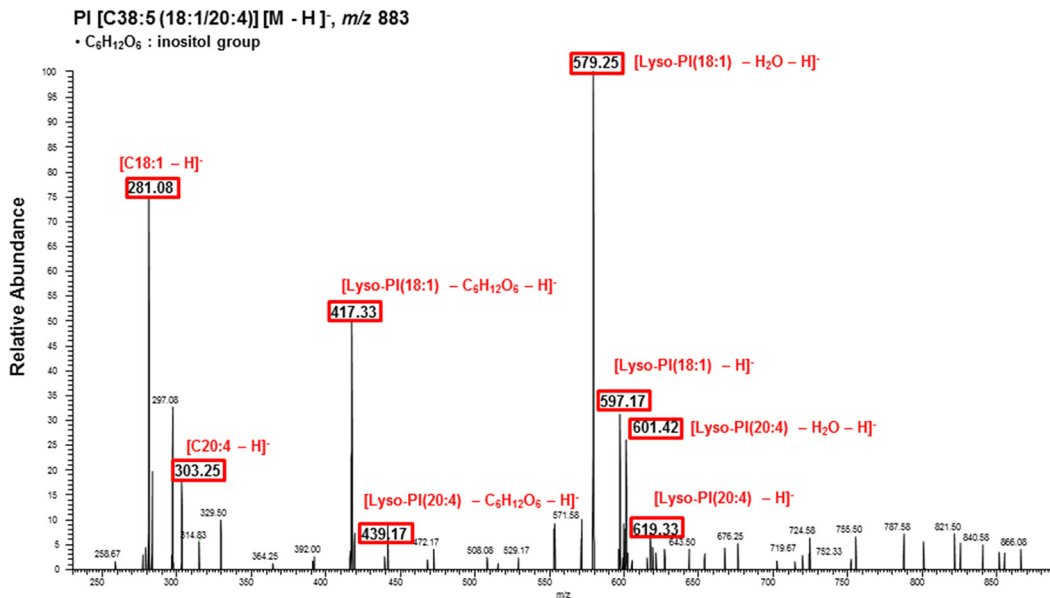

(Continued)

Compound #41

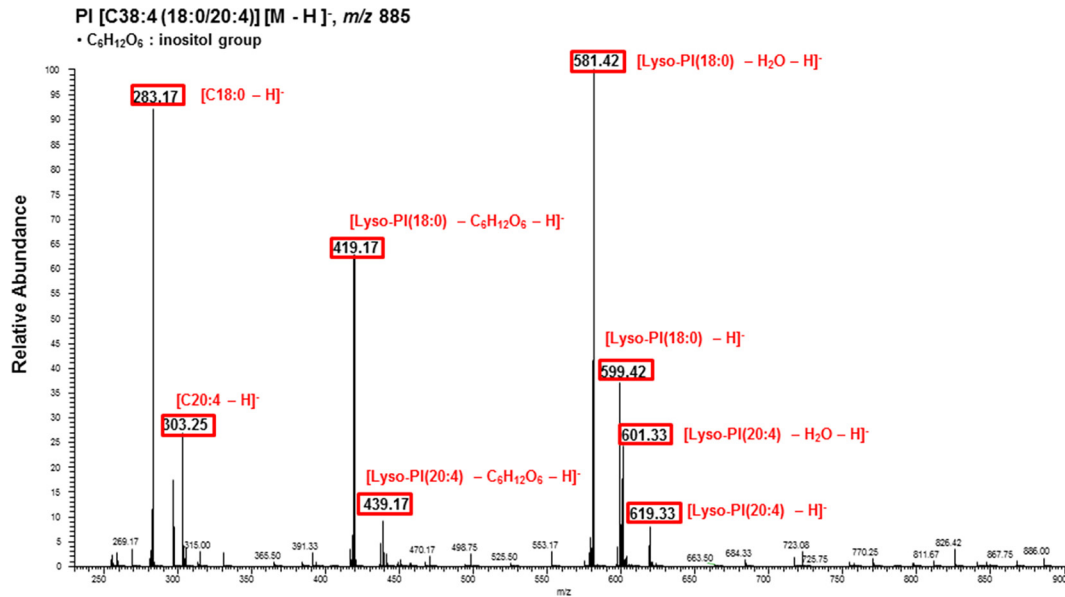

Compound #42

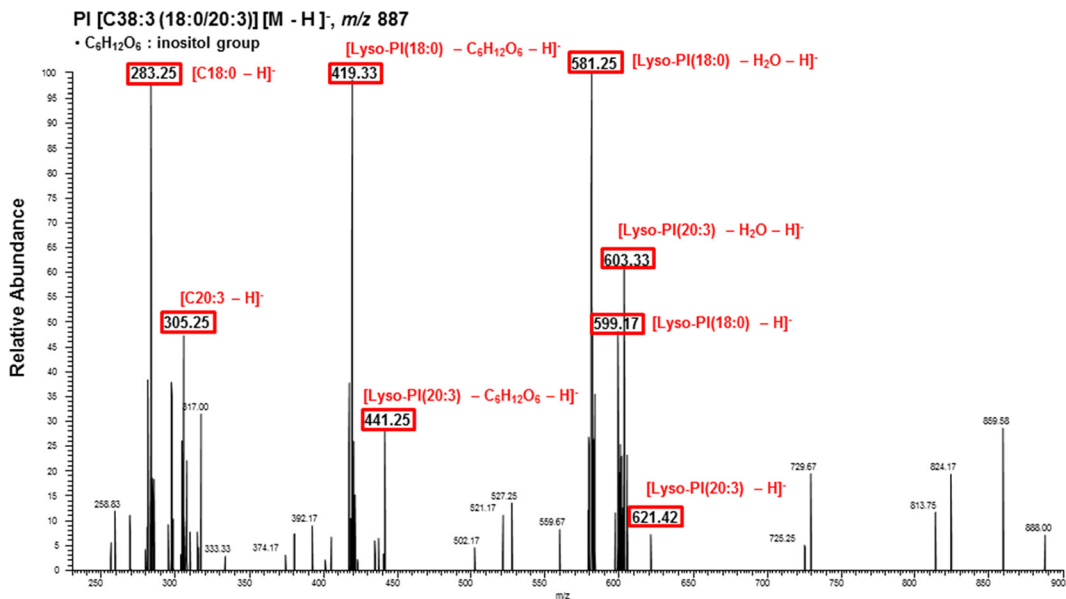

(Continued)

## Compound #43

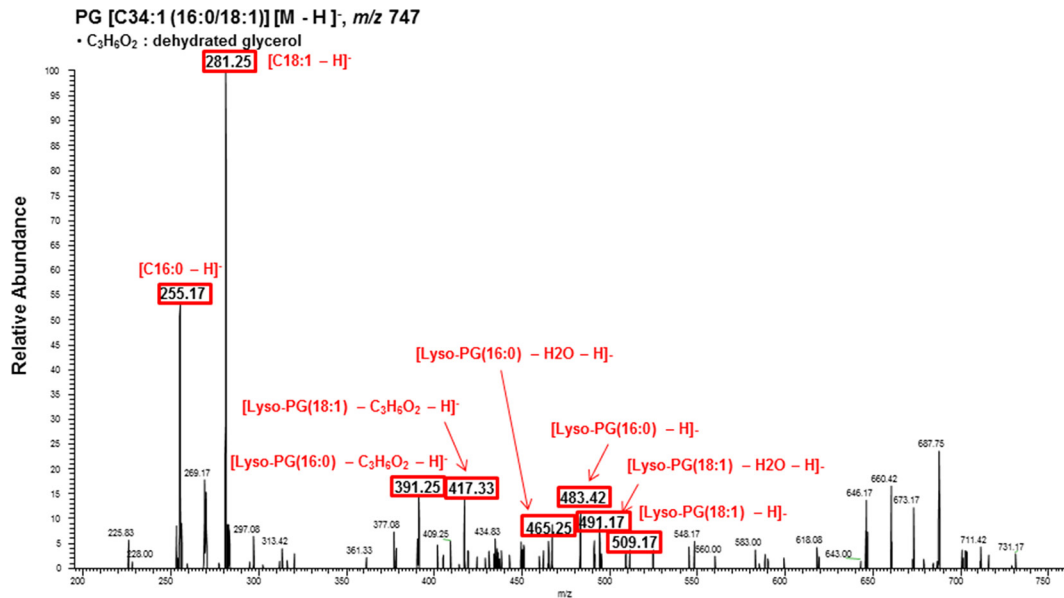

## Compound #44

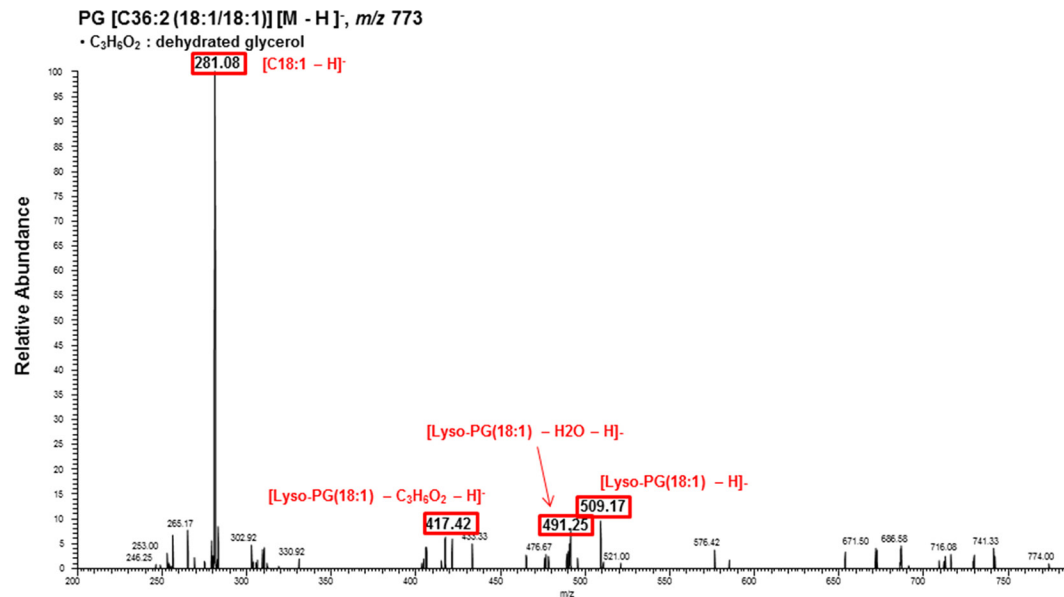

**Supplementary Figure S2: MS/MS spectra of the assigned 44 intact lipids in mammary epithelial and breast cancer cells using LTQ-XL mass spectrometry.** All lipids were identified by matching against the in-house MS/MS library, databases of Lipidmaps and LipidBlast, based on their major structural features, and the major precursor and fragment ions were indicated as red characters. Each compound corresponding to compound # was listed in Supplementary Table S2.

Supplementary Table S1: A GC-MS-based metabolic profile of breast cancer cells in different progression stages

| No.               | Compound      | RT                               | MCF-10A                      | MCF-7                         | MDA-MB-231                  |
|-------------------|---------------|----------------------------------|------------------------------|-------------------------------|-----------------------------|
| <b>Alcohol</b>    |               |                                  |                              |                               |                             |
| 1                 | Erythritol    | 19.03<br>19.05                   | 3.94 ± 0.75 <sup>a</sup>     | 14.55 ± 7.03 <sup>b</sup>     | 1.50 ± 0.27 <sup>a</sup>    |
| 2                 | Myo-inositol  | 28.95                            | 130.11 ± 41.21 <sup>a</sup>  | 62.12 ± 28.52 <sup>a</sup>    | 242.86 ± 87.10 <sup>b</sup> |
| <b>Amino acid</b> |               |                                  |                              |                               |                             |
| 3                 | Alanine       | 7.00                             | 110.92 ± 49.66 <sup>ab</sup> | 169.45 ± 56.46 <sup>a</sup>   | 74.36 ± 16.61 <sup>b</sup>  |
| 4                 | Asparagine    | 20.85                            | 9.08 ± 2.84 <sup>a</sup>     | 15.92 ± 5.47 <sup>b</sup>     | 6.15 ± 1.27 <sup>a</sup>    |
| 5                 | Aspartic acid | 15.06<br>17.41<br>17.43          | 119.17 ± 34.00 <sup>a</sup>  | 85.77 ± 42.08 <sup>ab</sup>   | 60.90 ± 13.09 <sup>b</sup>  |
| 6                 | Glutamine     | 19.78<br>19.79<br>19.81<br>23.11 | 343.20 ± 46.94 <sup>a</sup>  | 1401.87 ± 770.11 <sup>b</sup> | 355.54 ± 45.65 <sup>a</sup> |
| 7                 | Glycine       | 7.47<br>12.02<br>12.03           | 221.07 ± 47.07               | 315.14 ± 99.45                | 362.64 ± 138.97             |
| 8                 | Leucine       | 8.30<br>11.72                    | 54.91 ± 7.33                 | 101.75 ± 42.91                | 68.48 ± 24.12               |
| 9                 | Lysine        | 26.08                            | 89.80 ± 18.56                | 150.53 ± 65.83                | 91.28 ± 26.41               |
| 10                | Ornithine     | 24.00                            | 5.09 ± 1.33 <sup>a</sup>     | 6.96 ± 2.16 <sup>a</sup>      | 17.80 ± 3.10 <sup>b</sup>   |
| 11                | Proline       | 11.81                            | 38.33 ± 11.90 <sup>a</sup>   | 112.39 ± 50.66 <sup>b</sup>   | 25.09 ± 8.62 <sup>a</sup>   |
| 12                | Serine        | 10.81<br>13.45                   | 43.61 ± 12.39 <sup>a</sup>   | 191.98 ± 104.09 <sup>b</sup>  | 38.99 ± 12.56 <sup>a</sup>  |
| 13                | Threonine     | 11.74<br>11.75<br>14.08<br>14.09 | 39.35 ± 9.52 <sup>a</sup>    | 258.60 ± 80.39 <sup>b</sup>   | 33.90 ± 9.90 <sup>a</sup>   |
| 14                | Tryptophan    | 30.92                            | 25.12 ± 8.06 <sup>ab</sup>   | 42.38 ± 15.92 <sup>a</sup>    | 18.97 ± 5.16 <sup>b</sup>   |
| 15                | Tyrosine      | 26.37                            | 137.08 ± 34.37 <sup>a</sup>  | 389.82 ± 193.48 <sup>b</sup>  | 101.24 ± 15.73 <sup>a</sup> |
| 16                | Valine        | 6.71<br>9.74<br>9.76             | 98.82 ± 30.15 <sup>a</sup>   | 323.69 ± 105.30 <sup>b</sup>  | 78.92 ± 26.64 <sup>a</sup>  |

(Continued)

| No.                 | Compound               | RT    | MCF-10A                     | MCF-7                         | MDA-MB-231                   |
|---------------------|------------------------|-------|-----------------------------|-------------------------------|------------------------------|
| <b>Fatty acid</b>   |                        |       |                             |                               |                              |
| 17                  | 3-hydroxybutanoic acid | 8.05  | 26.96 ± 6.97 <sup>a</sup>   | 22.64 ± 11.89 <sup>a</sup>    | 49.06 ± 12.80 <sup>b</sup>   |
| 18                  | Oleic acid             | 31.08 | 1.41 ± 0.71                 | 1.68 ± 1.33                   | 2.44 ± 0.60                  |
| 19                  | Palmitic acid          | 28.36 | 13.73 ± 2.11 <sup>ab</sup>  | 12.54 ± 4.31 <sup>a</sup>     | 20.13 ± 7.57 <sup>b</sup>    |
| 20                  | Stearic acid           | 31.49 | 7.84 ± 3.60                 | 8.26 ± 2.33                   | 11.92 ± 3.58                 |
| <b>Organic acid</b> |                        |       |                             |                               |                              |
| 21                  | Isocitric acid         | 24.07 | 2.14 ± 0.76 <sup>a</sup>    | 12.26 ± 4.53 <sup>b</sup>     | 8.64 ± 3.01 <sup>b</sup>     |
| 22                  | Lactic acid            | 6.04  | 32.16 ± 7.87 <sup>a</sup>   | 199.70 ± 85.43 <sup>b</sup>   | 59.49 ± 23.99 <sup>a</sup>   |
| 23                  | Malic acid             | 16.67 | 7.74 ± 2.46 <sup>a</sup>    | 14.68 ± 4.87 <sup>b</sup>     | 5.10 ± 1.28 <sup>a</sup>     |
| 24                  | Oxalic acid            | 7.90  | 248.51 ± 94.00 <sup>a</sup> | 388.76 ± 128.54 <sup>ab</sup> | 509.14 ± 194.63 <sup>b</sup> |
| 25                  | Pyruvic acid           | 7.63  | 11.16 ± 7.74                | 11.97 ± 4.66                  | 15.44 ± 3.16                 |
| <b>Purine</b>       |                        |       |                             |                               |                              |
| 26                  | Adenine                | 24.95 | 6.71 ± 1.03 <sup>a</sup>    | 8.28 ± 1.48 <sup>a</sup>      | 109.12 ± 13.81 <sup>b</sup>  |
| 27                  | Guanine                | 29.59 | 0.37 ± 0.06 <sup>a</sup>    | 116.02 ± 58.59 <sup>b</sup>   | 137.75 ± 18.65 <sup>b</sup>  |
| 28                  | Hypoxanthine           | 23.73 | 244.10 ± 92.38 <sup>a</sup> | 167.28 ± 97.68 <sup>ab</sup>  | 84.17 ± 9.68 <sup>b</sup>    |
| 29                  | Inosine                | 36.11 | 11.30 ± 1.94 <sup>a</sup>   | 22.60 ± 11.00 <sup>b</sup>    | 2.34 ± 1.21 <sup>a</sup>     |
| 30                  | Uracil                 | 12.86 | 22.51 ± 3.40 <sup>a</sup>   | 2.05 ± 0.76 <sup>b</sup>      | 29.13 ± 6.33 <sup>a</sup>    |
| 31                  | Xanthine               | 27.80 | 20.49 ± 6.32 <sup>a</sup>   | 0.23 ± 0.35 <sup>b</sup>      | 2.71 ± 0.74 <sup>b</sup>     |
| <b>Sugar</b>        |                        |       |                             |                               |                              |
| 32                  | 6-phosphogluconic acid | 33.93 | 4.58 ± 1.35                 | 3.18 ± 2.67                   | 4.61 ± 2.15                  |
| 33                  | Fructose-6-phosphate   | 32.31 | 34.04 ± 13.35 <sup>a</sup>  | 5.94 ± 4.14 <sup>b</sup>      | 12.92 ± 3.98 <sup>b</sup>    |
| 34                  | Glucose                | 27.15 | 11.88 ± 8.37 <sup>ab</sup>  | 20.67 ± 12.67 <sup>a</sup>    | 7.15 ± 1.70 <sup>b</sup>     |
| 35                  | Glucose-6-phosphate    | 32.32 | 187.35 ± 36.35 <sup>a</sup> | 41.77 ± 23.83 <sup>b</sup>    | 118.50 ± 30.10 <sup>c</sup>  |
|                     |                        | 32.49 |                             |                               |                              |
|                     |                        | 32.74 |                             |                               |                              |
|                     |                        | 33.03 |                             |                               |                              |
|                     |                        | 33.33 |                             |                               |                              |
|                     |                        | 33.50 |                             |                               |                              |
| 36                  | Glyceric acid          | 12.67 | 0.94 ± 0.37 <sup>a</sup>    | 2.43 ± 0.99 <sup>b</sup>      | 0.92 ± 0.62 <sup>a</sup>     |
| 37                  | Mannose-6-phosphate    | 35.72 | 59.41 ± 18.13 <sup>a</sup>  | 17.48 ± 9.79 <sup>b</sup>     | 11.95 ± 3.52 <sup>b</sup>    |
| 38                  | Sucrose                | 36.96 | 6.20 ± 2.29                 | 5.85 ± 0.90                   | 8.06 ± 3.77                  |
| <b>Other</b>        |                        |       |                             |                               |                              |
| 39                  | Creatinine             | 18.10 | 3.86 ± 2.02 <sup>a</sup>    | 14.50 ± 6.90 <sup>b</sup>     | 3.10 ± 1.48 <sup>a</sup>     |

Different letters in the same row indicate a significant difference. Mean ± SD value for quintuplicate measurements are shown. The values are multiplied by '10e3' due to significantly small values

**Supplementary Table S2: Normalized ion intensities of identified lipids in mammary epithelial cells (MCF-10A) and metastatic breast cancer cells (MCF-7 and MDA-MB-231) using nano-electrospray mass spectrometry**

| No.                                              | Lipid molecular species (total acyl carbons:total double bonds) | Proposed composition | Ion species          | m/z | MCF-10A                   | MCF-7                      | MDA-MB-231                 |
|--------------------------------------------------|-----------------------------------------------------------------|----------------------|----------------------|-----|---------------------------|----------------------------|----------------------------|
| Positive ion mode                                |                                                                 |                      |                      |     |                           |                            |                            |
| Phosphatidylcholine (PC)                         |                                                                 |                      |                      |     |                           |                            |                            |
| 1                                                | PC 34:2                                                         | C16:1/C18:1          | [M + H] <sup>+</sup> | 758 | 1.77 ± 0.26 <sup>a</sup>  | 3.52 ± 0.39 <sup>b</sup>   | 4.37 ± 1.07 <sup>b</sup>   |
| 2                                                | PC 36:3                                                         | C18:1/C18:2          | [M + H] <sup>+</sup> | 784 | 2.05 ± 0.42 <sup>a</sup>  | 4.93 ± 0.58 <sup>ab</sup>  | 8.42 ± 3.58 <sup>b</sup>   |
| 3                                                | PC 36:2                                                         | C18:1/C18:1          | [M + H] <sup>+</sup> | 786 | 9.72 ± 2.33 <sup>a</sup>  | 24.65 ± 2.90 <sup>ab</sup> | 39.53 ± 15.19 <sup>b</sup> |
| 4                                                | PC 37:3                                                         | C18:3/C19:0          | [M + H] <sup>+</sup> | 798 | 7.45 ± 5.28 <sup>a</sup>  | 10.67 ± 3.46 <sup>a</sup>  | 8.63 ± 0.97 <sup>a</sup>   |
| 5                                                | PC 38:5                                                         | C18:2/C20:3          | [M + H] <sup>+</sup> | 808 | 0.37 ± 0.12 <sup>a</sup>  | 1.19 ± 0.32 <sup>b</sup>   | 1.68 ± 0.75 <sup>b</sup>   |
| 6                                                | PC 38:4                                                         | C18:0/C20:4          | [M + H] <sup>+</sup> | 810 | 0.39 ± 0.05 <sup>a</sup>  | 0.63 ± 0.12 <sup>a</sup>   | 1.76 ± 0.27 <sup>b</sup>   |
| 7                                                | PC 38:2                                                         | C18:1/C20:1          | [M + H] <sup>+</sup> | 814 | 1.36 ± 0.22 <sup>a</sup>  | 2.54 ± 0.29 <sup>b</sup>   | 1.39 ± 0.23 <sup>a</sup>   |
| 8                                                | PC 38:1                                                         | C18:1/C20:0          | [M + H] <sup>+</sup> | 816 | 2.88 ± 0.49 <sup>a</sup>  | 4.52 ± 0.60 <sup>b</sup>   | 5.27 ± 0.83 <sup>b</sup>   |
| 9                                                | PC 38:0                                                         | C18:0/C20:0          | [M + H] <sup>+</sup> | 818 | 3.39 ± 1.63 <sup>a</sup>  | 5.11 ± 2.16 <sup>ab</sup>  | 7.73 ± 2.77 <sup>b</sup>   |
| 10                                               | PC 40:6                                                         | C18:1/C22:5          | [M + H] <sup>+</sup> | 834 | 1.33 ± 0.17 <sup>a</sup>  | 2.10 ± 0.19 <sup>b</sup>   | 2.03 ± 0.21 <sup>b</sup>   |
| Plasmenylphosphatidylcholine (plasmenyl-PC)      |                                                                 |                      |                      |     |                           |                            |                            |
| 11                                               | Plasmenyl-PC 38:1                                               | C20:0/C18:1          | [M + H] <sup>+</sup> | 800 | 3.87 ± 1.43 <sup>a</sup>  | 7.46 ± 0.64 <sup>b</sup>   | 3.67 ± 2.00 <sup>a</sup>   |
| Plasmenylphosphatidylethanolamine (plasmenyl-PE) |                                                                 |                      |                      |     |                           |                            |                            |
| 12                                               | plasmenyl-PE 34:0                                               | C18:0/C16:0          | [M + H] <sup>+</sup> | 704 | 1.33 ± 0.49 <sup>a</sup>  | 1.98 ± 0.64 <sup>a</sup>   | 2.02 ± 0.32 <sup>a</sup>   |
| Sphingomyelin (SM)                               |                                                                 |                      |                      |     |                           |                            |                            |
| 13                                               | SM 34:1                                                         | D18:1/16:0           | [M] <sup>+</sup>     | 703 | 2.07 ± 0.94 <sup>a</sup>  | 2.26 ± 0.92 <sup>a</sup>   | 3.10 ± 0.76 <sup>a</sup>   |
| Negative ion mode                                |                                                                 |                      |                      |     |                           |                            |                            |
| Phosphatidylethanolamine (PE)                    |                                                                 |                      |                      |     |                           |                            |                            |
| 14                                               | PE 36:2                                                         | C18:1/C18:1          | [M - H] <sup>-</sup> | 742 | 10.01 ± 0.69 <sup>a</sup> | 16.17 ± 0.67 <sup>b</sup>  | 4.68 ± 0.30 <sup>c</sup>   |
| 15                                               | PE 36:0                                                         | C17:0/C19:0          | [M - H] <sup>-</sup> | 746 | 2.79 ± 0.57 <sup>a</sup>  | 7.30 ± 0.37 <sup>b</sup>   | 4.35 ± 1.37 <sup>c</sup>   |
| 16                                               | PE 38:5                                                         | C18:1/C20:4          | [M - H] <sup>-</sup> | 764 | 3.31 ± 0.27 <sup>a</sup>  | 8.87 ± 0.17 <sup>b</sup>   | 4.09 ± 0.62 <sup>c</sup>   |
| 17                                               | PE 40:5                                                         | C18:1/C22:4          | [M - H] <sup>-</sup> | 792 | 4.86 ± 0.36 <sup>a</sup>  | 8.11 ± 0.47 <sup>b</sup>   | 7.51 ± 1.27 <sup>b</sup>   |
| Plasmenylphosphatidylethanolamine (plasmenyl-PE) |                                                                 |                      |                      |     |                           |                            |                            |
| 18                                               | plasmenyl-PE 38:4                                               | C18:0/C20:4          | [M - H] <sup>-</sup> | 750 | 4.55 ± 0.28 <sup>a</sup>  | 1.65 ± 0.18 <sup>b</sup>   | 13.03 ± 1.02 <sup>c</sup>  |
| Phosphatidylserine (PS)                          |                                                                 |                      |                      |     |                           |                            |                            |
| 19                                               | PS 34:2                                                         | C16:1/C18:1          | [M - H] <sup>-</sup> | 758 | 7.56 ± 0.72 <sup>a</sup>  | 15.01 ± 1.36 <sup>b</sup>  | 25.11 ± 4.40 <sup>c</sup>  |
| 20                                               | PS 34:1                                                         | C16:0/C18:1          | [M - H] <sup>-</sup> | 760 | 33.19 ± 4.34 <sup>a</sup> | 48.96 ± 3.55 <sup>b</sup>  | 80.84 ± 12.65 <sup>c</sup> |

(Continued)

| No.                       | Lipid molecular species<br>(total acyl carbons:total double bonds) | Proposed composition | Ion species          | m/z | MCF-10A                   | MCF-7                     | MDA-MB-231                  |
|---------------------------|--------------------------------------------------------------------|----------------------|----------------------|-----|---------------------------|---------------------------|-----------------------------|
| 21                        | PS 34:0                                                            | C16:0/C18:0          | [M - H] <sup>-</sup> | 762 | 9.76 ± 0.96 <sup>a</sup>  | 11.87 ± 0.82 <sup>a</sup> | 20.15 ± 2.89 <sup>b</sup>   |
| 22                        | PS 35:1                                                            | C17:0/C18:1          | [M - H] <sup>-</sup> | 774 | 5.22 ± 0.56 <sup>a</sup>  | 12.82 ± 1.34 <sup>b</sup> | 6.31 ± 0.69 <sup>a</sup>    |
| 23                        | PS 36:3                                                            | C18:1/C18:2          | [M - H] <sup>-</sup> | 784 | 10.54 ± 1.10 <sup>a</sup> | 6.36 ± 0.63 <sup>a</sup>  | 34.69 ± 7.56 <sup>b</sup>   |
| 24                        | PS 36:2                                                            | C18:0/C18:2          | [M - H] <sup>-</sup> | 786 | 36.71 ± 2.26 <sup>a</sup> | 36.22 ± 3.41 <sup>a</sup> | 77.96 ± 12.92 <sup>b</sup>  |
| 25                        | PS 36:1                                                            | C18:0/C18:1          | [M - H] <sup>-</sup> | 788 | 51.25 ± 3.70 <sup>a</sup> | 44.11 ± 2.35 <sup>a</sup> | 104.38 ± 12.65 <sup>b</sup> |
| 26                        | PS 36:0                                                            | C18:0/C18:0          | [M - H] <sup>-</sup> | 790 | 11.46 ± 0.72 <sup>a</sup> | 23.03 ± 0.96 <sup>b</sup> | 24.21 ± 1.86 <sup>b</sup>   |
| 27                        | PS 38:4                                                            | C18:0/C20:4          | [M - H] <sup>-</sup> | 810 | 2.70 ± 0.50 <sup>a</sup>  | 2.88 ± 0.18 <sup>a</sup>  | 11.97 ± 1.30 <sup>b</sup>   |
| 28                        | PS 38:1                                                            | C18:1/C20:0          | [M - H] <sup>-</sup> | 816 | 7.29 ± 0.42 <sup>a</sup>  | 11.43 ± 0.52 <sup>b</sup> | 10.23 ± 0.88 <sup>c</sup>   |
| 29                        | PS 40:6                                                            | C18:0/C22:6          | [M - H] <sup>-</sup> | 834 | 2.91 ± 0.33 <sup>a</sup>  | 5.63 ± 0.55 <sup>b</sup>  | 12.13 ± 1.18 <sup>c</sup>   |
| 30                        | PS 40:5                                                            | C18:1/C22:4          | [M - H] <sup>-</sup> | 836 | 5.35 ± 0.60 <sup>a</sup>  | 13.14 ± 0.75 <sup>b</sup> | 12.88 ± 1.32 <sup>b</sup>   |
| 31                        | PS 40:4                                                            | C18:0/C22:4          | [M - H] <sup>-</sup> | 838 | 2.82 ± 0.32 <sup>a</sup>  | 3.01 ± 0.26 <sup>a</sup>  | 10.62 ± 1.61 <sup>b</sup>   |
| 32                        | PS 40:2                                                            | C18:1/C22:1          | [M - H] <sup>-</sup> | 842 | 5.38 ± 0.26 <sup>a</sup>  | 3.46 ± 0.06 <sup>b</sup>  | 5.76 ± 0.52 <sup>a</sup>    |
| 33                        | PS 40:1                                                            | C18:1/C22:0          | [M - H] <sup>-</sup> | 844 | 9.54 ± 0.58 <sup>a</sup>  | 15.09 ± 0.72 <sup>b</sup> | 13.10 ± 1.15 <sup>c</sup>   |
| Phosphatidylinositol (PI) |                                                                    |                      |                      |     |                           |                           |                             |
| 34                        | PI 32:1                                                            | C16:0/C16:1          | [M - H] <sup>-</sup> | 807 | 2.22 ± 0.15 <sup>a</sup>  | 7.17 ± 0.29 <sup>a</sup>  | 37.76 ± 8.27 <sup>b</sup>   |
| 35                        | PI 34:2                                                            | C16:1/C18:1          | [M - H] <sup>-</sup> | 833 | 5.50 ± 0.44 <sup>a</sup>  | 6.28 ± 0.43 <sup>a</sup>  | 11.56 ± 1.42 <sup>b</sup>   |
| 36                        | PI 34:1                                                            | C16:0/C18:1          | [M - H] <sup>-</sup> | 835 | 9.49 ± 0.76 <sup>a</sup>  | 23.30 ± 1.44 <sup>b</sup> | 13.32 ± 2.38 <sup>c</sup>   |
| 37                        | PI 36:2                                                            | C18:1/C18:1          | [M - H] <sup>-</sup> | 861 | 27.51 ± 1.95 <sup>a</sup> | 18.17 ± 1.25 <sup>b</sup> | 6.75 ± 0.60 <sup>c</sup>    |
| 38                        | PI 36:1                                                            | C18:0/C18:1          | [M - H] <sup>-</sup> | 863 | 21.06 ± 1.47 <sup>a</sup> | 35.18 ± 2.23 <sup>b</sup> | 3.39 ± 0.41 <sup>c</sup>    |
| 39                        | PI 38:6                                                            | C16:0/C22:6          | [M - H] <sup>-</sup> | 881 | 2.02 ± 1.11 <sup>a</sup>  | 3.19 ± 0.36 <sup>a</sup>  | 7.73 ± 3.08 <sup>b</sup>    |
| 40                        | PI 38:5                                                            | C18:1/C20:4          | [M - H] <sup>-</sup> | 883 | 1.63 ± 0.27 <sup>a</sup>  | 2.04 ± 0.19 <sup>a</sup>  | 6.89 ± 1.28 <sup>b</sup>    |
| 41                        | PI 38:4                                                            | C18:0/C20:4          | [M - H] <sup>-</sup> | 885 | 10.73 ± 0.86 <sup>a</sup> | 7.42 ± 0.57 <sup>a</sup>  | 62.18 ± 7.40 <sup>b</sup>   |
| 42                        | PI 38:3                                                            | C18:0/C20:3          | [M - H] <sup>-</sup> | 887 | 11.90 ± 0.82 <sup>a</sup> | 5.74 ± 0.49 <sup>b</sup>  | 13.90 ± 1.61 <sup>c</sup>   |
| Phosphatidylglycerol (PG) |                                                                    |                      |                      |     |                           |                           |                             |
| 43                        | PG 34:1                                                            | C16:0/C18:1          | [M - H] <sup>-</sup> | 747 | 4.99 ± 0.61 <sup>a</sup>  | 8.17 ± 0.61 <sup>b</sup>  | 3.61 ± 0.95 <sup>c</sup>    |
| 44                        | PG 36:2                                                            | C18:1/C18:1          | [M - H] <sup>-</sup> | 773 | 4.40 ± 0.61 <sup>a</sup>  | 8.90 ± 1.34 <sup>b</sup>  | 0.96 ± 0.27 <sup>c</sup>    |

<sup>a</sup> Each value represents the mean ± standard deviation (SD) (n = 5).

<sup>b</sup> For simplicity, '×10e1' and '×10e2' were omitted from the values of identified lipids in positive mode and negative mode, respectively.
